## **TNF increases Tyrosine Hydroxylase expression in human monocytes**

Madison Francis<sup>a1</sup>, Martin Badov<sup>a1</sup>, Gerry Shaw<sup>1,2</sup>, Anthony Collins<sup>1</sup>, Douglas R. Miller<sup>1</sup>, Carissa A. Hansen<sup>1</sup>, Phillip Mackie<sup>1</sup>, Malú Gámez Tansey<sup>1</sup>, Abeer Dagra<sup>1</sup>, Irina Madorsky<sup>2</sup>, Adolfo Ramirez-Zamora<sup>3</sup>, Michael S. Okun<sup>1,3</sup>, Wolfgang J. Streit<sup>1</sup>, Adithya Gopinath<sup>\*1</sup>, Habibeh Khoshbouei<sup>1</sup>

1-University of Florida, Department of Neuroscience, Center for Translational Research in Neurodegenerative Disease, Norman Fixel Institute for Neurological Diseases

2-Encor Biotechnology Inc. 4949 SW 41<sup>st</sup> Blvd Suite 40, Gainesville FL 32608

3-University of Florida, Department of Neurology

<sup>a</sup> equal contribution

Corresponding Author:

\*Adithya Gopinath

[adithya@ufl.edu](mailto:adithya@ufl.edu)

Number of Pages (incl. References): 28

Number of Tables: 4

Number of Figures: 6

Number of References: 72

Abbreviations: No non-standard abbreviations used

## **Abstract**

Most, if not all, peripheral immune cells in humans and animals express tyrosine hydroxylase (TH), the rate limiting enzyme in catecholamine synthesis. Since TH is typically studied in the context of brain catecholamine signaling, little is known about changes in TH production and function in peripheral immune cells. This knowledge gap is due, in part, to the lack of an adequately sensitive assay to measure TH in immune cells expressing lower TH levels compared to other TH expressing cells. Here, we report the development of a highly sensitive and reproducible Bio-ELISA to quantify picogram levels of TH in multiple model systems. We have applied this assay to monocytes isolated from blood of persons with Parkinson's disease (PD) and to age-matched, healthy controls. Our study unexpectedly revealed that PD patients' monocytes express significantly higher levels of TH protein in peripheral monocytes relative to healthy controls. Tumor necrosis factor (TNF), a pro-inflammatory cytokine, has also been shown to be increased in the brains and peripheral circulation in human PD, as well as in animal models of PD. Therefore, we investigated a possible connection between higher levels of TH protein and the known increase in circulating TNF in PD. Monocytes isolated from healthy donors were treated with TNF or with TNF in the presence of an inhibitor. Tissue plasminogen activator (TPA) was used as a positive control. We observed that TNF stimulation increased both the number of TH<sup>+</sup> monocytes and the quantity of TH per monocyte, without increasing the total numbers of monocytes. These results revealed that TNF could potentially modify monocytic TH production and serve a regulatory role in peripheral immune function. The development and application of a highly sensitive assay to quantify TH in both human and animal cells will provide a novel tool for further investigating possible PD immune regulatory pathways between brain and periphery.

## **Introduction**

Human and animal studies have shown that most if not all immune cells possess components necessary to release, uptake, synthesize, and respond to catecholamines such as

dopamine and norepinephrine (NOR). These components activate signaling cascades that change the phenotype and function of cells in both healthy and in disease conditions. Immune cells may thus both come in contact with physiological levels of catecholamines derived from peripheral tissues and also serve as a source for catecholamines. Tyrosine hydroxylase (TH) catalyzes the conversion of tyrosine to 3,4-dihydroxyphenylalanine (L-DOPA), which is the rate-limiting step in the synthesis of dopamine, norepinephrine (NOR) and epinephrine<sup>1,2</sup>. Although primarily studied in the central nervous system<sup>3,4</sup>, TH is expressed in the majority of peripheral immune cells<sup>5-9</sup>, and many peripheral tissues<sup>10</sup>, such as kidney<sup>11,12</sup>, heart<sup>13</sup> and adrenal cortex<sup>14-16</sup>. Both myeloid and lymphoid lineages of human peripheral immune cells express TH<sup>17,18</sup>, which is thought to regulate dopamine levels within these cells<sup>9</sup>. As the key to catecholamine production, TH activity and its relative expression are commonly studied in diseases in which catecholamine tone, synthesis and signaling are altered. These disease states include bipolar disorder, addiction, schizophrenia, attention deficit hyperactivity (ADHD) and neurodegenerative conditions such as Parkinson's disease (PD).

The lack of a robust and sensitive assay to measure low levels of TH protein has hampered the field's ability to investigate TH protein levels in peripheral immune cells in diseases characterized by altered catecholamine tone. For example, in PD, due to its spatially restricted expression in the basal ganglia, decreases in TH levels in the CNS are readily detectable<sup>19,20</sup>. In contrast, very low TH levels in countless immune cells spread across the body has made it difficult to study TH protein levels in peripheral immune cells. In order to investigate whether the characteristically reduced TH expression in PD central nervous system (CNS) is recapitulated in peripheral immune cells, we established a sensitive assay to quantify TH protein. We then applied the assay to analyze TH production in peripheral blood monocytes. The sensitivity of our Bio-ELISA was a thousand-fold above traditional detection methods, and when we measured TH level in peripheral monocytes from healthy controls and from PD, we observed a significant elevation of TH levels in PD monocytes versus controls. This observation

was contrary to our *a priori* hypothesis. The unexpected discovery of increased TH protein in peripheral PD monocytes prompted investigation into the potential underlying mechanism. In the PD literature, there is a strong consensus that neuroinflammatory cytokines, such as TNF and IL6 are increased in CSF and serum of PD patients and of animal models of PD<sup>19,21-29</sup>.

Therefore, we investigated whether *ex vivo* exposure to TNF or IL6 increases the number of TH+ monocytes and/or amount of TH protein per monocyte. We found that exposure to TNF, but not IL6 increased both the number of TH+ monocytes and the quantity of TH protein per cell.

## **Materials and Methods**

**Human subjects:** Human midbrain tissues and striatum tissues were obtained *via* approved IRB protocols #IRB201800374 and RB202002059 respectively. Blood samples were obtained at the University of Florida Center for Movements Disorders and Neurorestoration according to an IRB-approved protocol (#IRB201701195).

### **Brain tissues from healthy subjects**

Human midbrain tissues of healthy subjects were obtained *via* approved IRB protocol #IRB201800374. Human striatum tissues for were obtained *via* approved IRB protocol #IRB202002059, from the UF Neuromedicine Human Brain and Tissue Bank (UF HBTB). Regions of interest were identified and isolated by a board-certified neuropathologist.

### **Blood samples from healthy subjects**

Blood samples from age-matched healthy subjects were obtained from two sources: an approved IRB protocol or were purchased from Lifesouth Community Blood Center, Gainesville, FL from August 2017 to January 2020. According to Lifesouth regulations, healthy donors were individuals aged 50-80 years-old of any gender, who were not known to have any blood borne pathogens (both self-reported and independently verified), and were never diagnosed with a blood disease, such as leukemia or bleeding disorders. In addition, none of the donors were

using blood thinners or antibiotics, or were exhibiting signs/symptoms of infectious disease, or had a positive test for viral infection in the previous 21 days.

#### **Blood samples from PD patients:**

Blood samples were obtained from PD patients (aged 50-80 years-old of any gender) at the University of Florida Center for Movements Disorders and Neurorestoration according to an IRB-approved protocol (#IRB201701195), via written informed consent. Patients were known to not have any recorded blood-borne pathogens or blood diseases, nor were they currently taking medications for infections according to their medical record. In addition, none of the donors were using blood thinners or antibiotics or were exhibiting signs/symptoms of infectious disease, or had a positive test for viral infection in the previous 21 days.

#### **TH recombinant protein**

Full length human TH protein was expressed from a synthetic cDNA inserted into the *EcoRI* and *Sall* sites of the pET30a(+) vector and was codon optimized for expression in *E. coli*. The vector adds an N-terminal His-tag and other vector sequence, a total of 5.7kDa. Expression of the construct was made by standard methods and purification was performed using the His tag by immobilized metal affinity chromatography on a nickel column. The TH sequence used in this study is the human tyrosine 3-monooxygenase isoform shown in Uniprot entry P07101-2. A plasmid map of the vector used for recombinant TH production is shown in Figure S1.

#### **Model systems used for the validation of bio-ELISA**

**Human macrophages:** Primary human macrophages were cultured as described previously<sup>30</sup>. Peripheral blood mononuclear cells (PBMCs) isolated as described below were re-suspended in RPMI 1640 containing 1% Pen/Strep and 7.5% sterile-filtered, heat-inactivated autologous serum isolated from the donor's own blood, and plated in 24-well untreated polystyrene plates at 1 million PBMCs per well. To retain only monocytes/macrophages, cells were washed to remove non-adherent cells with incomplete RPMI 1640, followed by

replacement with complete media. Media was replaced at days 3 and 6 following culture, and cell lysis performed on day 7 following culture.

**Primary murine midbrain dopamine neurons:** Midbrain dopamine neurons strongly express TH<sup>31</sup> and were used as a positive control group. Acutely dissociated mouse midbrains from 0-2 day-old male and female pups were isolated and incubated in dissociation medium at 37°C under continuous oxygenation for 90 minutes. Dissociated cells were pelleted by centrifugation at 1,500×g for 5 min and resuspended and triturated in glial medium (Table 4). Cells were then plated on 12 mm coverslips coated with 0.1 mg/ml poly-D-lysine and 5 µg/ml laminin and maintained in neuronal media. Every 4 days, half the media was replaced with fresh media. The materials used for the preparation and maintenance of midbrain neuronal culture are outlined in Table 4.

**Positive and negative control cell lines:** All cell cultures were maintained at 37°C with 5% CO<sub>2</sub> and all cell culture supplies are listed in Table 2. HEK293 cells<sup>32</sup> are not thought to express TH and so were used as a negative expression control and were cultured as described previously<sup>33,34</sup>. PC12 cells express TH<sup>35</sup> and were used as a positive control. The cells were cultured as described by Cartier et al. 2010<sup>36</sup>. CHO cells were cultured as previously described<sup>37</sup>, and were used as a negative control for TH expression.

### **PBMC isolation**

PBMCs express TH<sup>30,38</sup>. As previously published<sup>38</sup>, whole blood was collected in K2EDTA vacutainer blood collection tubes (BD, 366643) and held at room temperature for up to 2 hours prior to PBMC isolation. Briefly, blood from healthy volunteers and PD patients was overlaid in Leucosep tubes (Table 3) for PBMC isolation, centrifuged for 20 minutes at 400g with brakes turned off and acceleration set to minimum. PBMCs were collected from the interphase of Ficoll and PBS, transferred to a fresh 15mL conical tube, resuspended in 8mL sterile PBS and centrifuged for 10 minutes at 100g, and repeated twice more. Cells were counted with a

hemacytometer using trypan blue exclusion of dead cells, and density-adjusted for downstream applications.

### **Magnetic monocyte isolation**

PBMCs are composed of multiple cell subsets<sup>39</sup>, each with distinct function and catecholamine sensitivity<sup>40,41</sup> – for example, lymphocyte regulation by catecholamines dopamine and NOR<sup>5,6,42</sup> have been studied for several decades<sup>8,18,43,44</sup>, while data regarding catecholamine function in myeloid lineage cells such as monocytes is less abundant. Here, we were narrowly focused on studying peripheral monocytes which we and others have previously shown to express TH<sup>9,38,45-47</sup>.

CD14+ monocytes express TH<sup>38</sup>. Primary CD14+ monocytes were isolated using Biolegend MojoSort magnetic isolation kit (Biolegend, 480017) per manufacturer's instructions. Briefly, 20 million total PBMCs were counted, density adjusted to 1 million cells/uL, resuspended in MojoSort buffer, and incubated with TruStain Fc-block for 10 minutes at room temperature, followed by 1:10 anti-CD14 magnetic nanobeads for 15 minutes on ice. Following 2 washes with 2.5mL ice-cold MojoSort buffer, cell pellet was resuspended in 2.5mL MojoSort buffer and subject to three rounds of magnetic isolation per manufacturer's instructions. The resulting cell pellet was washed to remove remaining non-CD14+ cells and subject to cell lysis as detailed below.

### **Preparation of cell lysates**

Buffer used for lysate preparation is given in Table 2. Adherent cells in culture were lifted using 0.02% EDTA in PBS, diluted with 5 volumes of PBS, and centrifuged at 100 x *g*. Non-adherent cells (PC12) were centrifuged at 100 x *g* for 5 minutes at room temperature, and cell pellets were washed 3 times with 5 volumes of sterile PBS. Primary macrophages and primary murine neuron cultures were washed thrice with ice-cold PBS, on ice. Cell pellets and adherent primary cells were then lysed in ice-cold lysis buffer (10mM NaCl, 10% glycerol (v/v), 1mM EDTA, 1mM EGTA, and HEPES 20mM, pH 7.6), with Triton X-100 added to a final concentration of 1%,

containing 1x protease inhibitor cocktail (Millipore-Sigma, 539131) for one hour at 4°C with rotation. Resulting lysate was centrifuged at 12,000 x g for 15 minutes at 4°C. Supernatant was set aside for protein quantification by Lowry assay (Biorad, 5000112) and the remainder was stored at -80°C until use for downstream assays.

### **Western blot**

Reagents, antibodies and equipment are given in Tables 1, 2 and 3. Samples of PC12 lysate (5ug) and recombinant TH protein (120ng, 60ng, 30ng, 15ng, 7.5ng, 3.75ng, and 1.875ng) were incubated in Laemmli sample buffer containing 10% beta-mercaptoethanol at 37°C for 30 minutes, separated by SDS-PAGE on 10% bis/polyacrylamide gels, and transferred to nitrocellulose membranes. After first blocking for 1 hour in TBS-T (50mM Tris-HCl, 150mM NaCl, and 0.1% Tween 20) containing 5% dry milk (blocking buffer), then incubated with primary antibody against TH (Table 1) overnight at 4°C. Membranes were then incubated with an appropriate secondary antibody (Table 1) for 1 hour at room temperature with agitation. Following all antibody steps, membranes were washed three times for 5 minutes each using TBS-T. TH was visualized using the Licor Odyssey (Table 3).

### **Immunohistochemistry**

Human tissues were sectioned at 40µm on a vibrating microtome and subjected to antigen retrieval in citrate buffer (10mM citric acid, 2mM EDTA, 2% Tween-20, pH 6.2) at 96°C for 30 minutes, and then allowed to cool to room temperature. PFA-perfused mouse brain tissues were also sectioned at 40 µm on a vibrating microtome.

Human and murine brain tissues were quenched for 20 minutes with 3% hydrogen peroxide, blocked and permeabilized at 37°C for 1 hour in PBS containing 5% normal goat serum and 0.5% TritonX-100. Primary antibodies RPCA-TH and MCA-4H2 (1:500 and 1:100 dilution, respectively, Table 1) were incubated overnight, followed by secondaries conjugated to HRP (1:250, Table 1), incubated for 1 hour at room temperature. Sections were detected with HRP-substrate NiDAB (Vector Labs, Table 2).



### **Detection antibody (RPCA-TH) Biotinylation**

EZ-Link Sulfo-NHS-LC-Biotin (A39257, Thermo Scientific) at 20-fold molar biotin was used according to the manufacturer's protocol. Anti-biotin antibody was concentrated to 2mg/mL, pH was adjusted to 8.0 at room temperature. The conjugate was purified by gel filtration on a Biorad 10DG column (cat 732-2010) at room temperature.

### **ELISA for TH**

Antibodies used for ELISA are described in Table 1. Ten lanes of an Immulon 4 HBX High-Binding 96 well plate were coated with 100uL per well of 1:1,000 dilution of 1mg/mL mouse anti-TH (MCA-4H2) in coating buffer (28.3mM Na<sub>2</sub>CO<sub>3</sub>, 71.42mM NaHCO<sub>3</sub>, pH 9.6) for 20 hours at 4°C. Edge lanes 1 and 12 were left empty. Wells were blocked with 5% fat free milk in 1x TBS (pH 7.4) for 1 hour at room temperature on an orbital shaker set to 90rpm. To produce a standard curve, two standard curve lanes were generated, with six serial dilutions, beginning at 10ng/mL and 1ng/mL in TBS-T containing 1% fat free milk (with the last well in each standard curve lane left with incubation buffer only as a blank. Remaining wells were incubated in duplicate with lysates from cells of interest. Incubation was completed for 20 hours at 4°C on an ELISA shaker set to 475 rpm.

After each well was washed and aspirated 6 times with TBS-T, affinity purified polyclonal rabbit anti-TH (EnCor, RPCA-TH) conjugated to biotin was diluted 1:6,000 from a stock concentration of 1.65mg/mL in TBS-T with 1% fat-free milk and incubated for 1 hour at room temperature at 425rpm. 100uL Avidin-HRP (Vector labs, A-2004), diluted 1:2,500 in TBS-T with 1% fat-free milk, was added to each well following washing as described above, and incubated for 1 hour at room temperature at 425rpm. Following final washes, 150uL room temperature TMB-ELISA reagent (Thermo Fisher, 34028) was added to each well. The reaction was allowed to continue for 20 minutes, protected from light, and stopped by addition of 50uL 2N H<sub>2</sub>SO<sub>4</sub>. The plate was immediately read at 450nm.

Duplicate standard and sample wells were averaged, and background-subtracted based on blank wells. The concentration of TH for each experimental group was calculated using a quadratic curve equation calculated in Graphpad Prism 8, then normalized to total protein concentration per sample as calculated using the Lowry assay. Samples which produced negative values for TH concentration were considered below detection threshold, and therefore assigned a value of 0. Final TH values shown are presented as pg TH/mg total protein after multiplication of the nanogram TH value by 1,000 to show TH as picogram TH/milligram total protein.

### ***In vitro* stimulation/treatment with TNF, tissue plasminogen activator (TPA), TNF inhibitor XPro1595 and IL6**

Monocytes were isolated from total PBMCs prepared as described above<sup>38</sup> using negative selection (Biolegend, 480048) per manufacturer's instructions. Total PBMCs were Fc-blocked to reduce nonspecific binding, followed by incubations with biotin-conjugated antibody cocktail containing antibodies against all subsets except CD14 (negative selection), followed by incubation with magnetic-Avidin beads, allowing all subsets other than CD14+ monocytes to be bound to the magnet. CD14+ monocytes were collected from the supernatant fraction, washed, counted and density adjusted such that 2 million CD14+ monocytes were seeded per well (Figure 5A) and treated for 4 hours with vehicle, TPA (100ng/mL, Biolegend, 755802)<sup>7</sup>, TNF (17ng/mL, Biolegend, 570102)<sup>48</sup>, XPro1595 (50ng/mL), or IL6 (17ng/mL) in an ultra-low-adherence 6-well plate (Corning, 3471) to prevent adherence. Suspended cells from each treatment group were aspirated and placed in a 15mL conical tube, with any remaining adherent cells detached by incubation with 700uL Accumax solution for 3 minutes (Innovative Cell Technologies, AM105) and added to suspended cells. After pelleting cells by centrifugation (3 minutes x 100g, room temperature), cells were assayed by either flow cytometry<sup>38</sup> or lysed for ELISA as stated above ("Preparation of cell lysates").

As previously published<sup>38</sup>, cells for flow cytometry were fixed and permeabilized (eBioscience, 88-8824-00), and stained for intracellular marker TH (Millipore-Sigma, AB152, 1:100) followed by a species-specific secondary (anti-Rabbit BV421, BD, 565014). After resuspending the sample in a final volume of 250uL PBS, 5uL of Invitrogen CountBright Absolute Counting Beads (5000 beads/mL, Invitrogen, C36950) were added just prior to data acquisition (Sony Spectral Analyzer, SP6800). Monocytes were gated for single cells and positive TH expression (Figure 5B), and normalized to counting beads in each sample to obtain an absolute count of TH+ monocytes per uL suspension.

### **Statistics**

A two-tailed, unpaired T test was used to compare TH quantity in PD patients versus healthy control. In this experiment,  $P < 0.05$  was considered statistically significant. One-way ANOVA with Tukey's correction for multiple comparisons was used to compare TH-expressing monocytes assayed by flow cytometry and ELISA following treatment with TPA, TNF, XPro1595, IL6 or Vehicle.  $P < 0.05$  was considered statistically significant.

### **Results and discussion**

#### **Bio-ELISA successfully and reproducibly detects recombinant and native TH.**

To test the hypothesis that similar to CNS in PD, TH expression is reduced in peripheral blood monocytes, we first established a sensitive assay to quantify TH levels in monocytes from healthy controls, as well as various reference TH expressing systems. Given the plethora of biological systems expressing TH, there is an unmet need for a sensitive and reliable assay to quantify TH levels which with broad biological implications in basic science, preclinical and clinical research. To date, measurement of TH levels in midbrain neurons has been accomplished by immunohistochemistry, and Western blot<sup>49-52</sup>, while TH levels in peripheral immune cells has been assayed by flow cytometry<sup>38</sup>. Although reliable, these methods share a common shortcoming in that they are semi-quantitative at best, and at worst only indicate the

presence or absence of TH. This led us to develop a highly sensitive and fully quantitative enzyme-linked immunosorbent assay (Bio-ELISA) to measure TH protein levels.

Quantification of TH using Bio-ELISA depends on the availability of purified TH and high-quality antibodies against TH, preferably generated in two distinct host species. A panel of monoclonal and polyclonal antibodies were generated against full length recombinant human TH, and quality assessment was performed by standard ELISA, Western blotting, and appropriate cell and tissue staining. These novel antibodies behaved in all respects similarly to a widely used commercial TH antibody (AB152, Millipore-Sigma)<sup>53-56</sup>. A mouse monoclonal antibody, MCA-4H2, and a rabbit polyclonal, RPCA-TH, were selected as ELISA capture and detection antibodies, respectively. To confirm specificity, both antibodies were used to stain human and murine midbrain tissue (Figure 2). MCA-4H2 (Figure 2A) and RPCA-TH (Figure 2B) both showed high specificity for TH<sup>+</sup> dopamine neurons in both human and murine tissues with no visible background (Figure 2- top panels). Similarly, both MCA-4H2 and RPCA-TH showed high specificity and minimal background via Western blot analysis (Figure 2C).

Next, TH recombinant protein band identity was compared to TH expression in PC12 cells (Figure 1C). As predicted, PC12 lysate shows a single TH band at ~63 kDa, with a corresponding band for the TH recombinant protein at ~70 kDa. The observed difference in molecular weight between TH expressed in PC12 cells and recombinant TH protein is expected due to the additional 5.7kDa N-terminal His-tag. Both MCA-4H2 and RPCA-TH reliably detect both recombinant TH and native TH in PC12 lysates (Figure 1 D, E).

We prepared 1:1 serial dilutions of TH recombinant protein in Laemmli buffer, from 6ug/mL to 0.094ug/mL, to test the limits of detection using the Licor IR imaging system for Western blot (Figure 1F). While effective, detection *via* Licor Odyssey using an IR fluorescent dye affords a fixed lower detection limit of ~15ng, suggesting that IR fluorescent imaging is suitable for high expressing systems, but unsuitable for accurate quantification at low nanogram or picogram TH levels, reinforcing the need for a more sensitive, quantitative TH Bio-ELISA.

To quantify TH expression in control conditions, we first attempted a standard sandwich ELISA approach (Figure 1G), in which MCA-4H2 was used as the capture antibody, followed by incubation with recombinant TH, then RPCA-TH as detection antibody. Enzyme-based detection was accomplished by addition of HRP-conjugated secondary (goat anti-rabbit HRP, Vector, BA1000). While this reliably quantified TH, the standard version of this assay produced a lower detection threshold of 125pg/mL TH. We sought to further increase sensitivity of the assay by addition of a biotin-avidin amplification step (Avidin-HRP, Vector, A2004) (Figure 1H), which provided an improved lower threshold of 62.5pg/mL. A further refinement was the biotinylation of the rabbit detection antibody using Sulfo-NHS-LC-biotin (Thermo Scientific A39257) which improved sensitivity further by reducing background and producing a lower-threshold of detection at 15pg/mL (Figure 1-I) with biotinylated antibodies, hence the Bio-ELISA designation. We found that our Bio-ELISA is around one thousand-fold more sensitive than infrared Western blot imaging (15 pg/mL vs. 15 ng/mL). Both TH antibodies are available commercially from EnCor Biotechnology Inc.

**Antibodies MCA-4H2 and RPCA-TH reliably detect both native and denatured TH in mouse and human tissue.** Aiming to develop a novel and reliable ELISA for both human and murine tissues, we next sought to confirm specificity of these antibodies on native and denatured tissues from both human and mouse brain regions rich in tyrosine hydroxylase (Figure 2). MCA-4H2 (Figure 2A) and RPCA-TH (Figure 2B) detect TH<sup>+</sup> cell bodies and neuronal processes in both human and mouse midbrain. Similarly, both MCA-4H2 and RPCA-TH detect denatured TH on Western blot (Figure 2C) following separation on SDS-PAGE, with minimal non-specific bands in the negative control (parental CHO cell homogenate).

**TH Bio-ELISA reliably quantifies TH in PC12 cells, human macrophages, and cultured murine dopamine neurons.** Having established a reliable method with a suitably low detection threshold, we tested the TH Bio-ELISA on cell homogenates prepared from PC12 cells, HEK293 cells, cultured primary human macrophages derived from whole blood samples from healthy

donors, and primary cultures of midbrain dopamine neurons prepared from PND0-PND3 mouse pups. PC12 cells are known to express high levels of TH<sup>35</sup>, while HEK293 serve as negative control<sup>32,57</sup>. Cultured midbrain dopamine neurons are known to express TH as the rate limiting enzyme for dopamine<sup>34</sup> while cultured human monocyte-derived-macrophages express TH protein and mRNA<sup>9,30</sup>.

TH expression is shown as unit TH (picogram or nanogram) per mg total protein, as determined by the Lowry assay. PC12 homogenate provided a reliable positive control expressing high levels of TH (<10ng TH/mg total protein), while HEK293 homogenate showed no detectable levels of TH, in at least 6 independent replicates. As anticipated, cultured dopamine neurons from postnatal mice showed greater TH concentrations (~700pg TH/mg total protein) than cultured human macrophages (~300pg TH/mg total protein) (Figure 3A), suggesting the Bio-ELISA is applicable to cell and tissue samples derived from human and murine specimens, paving the way for use it in translational and preclinical studies involving measurements of TH protein. Visual representation of relative TH expression in PC12, HEK293, human macrophage and primary neuron homogenates are plotted on a representative standard curve (Figure 3B). Raw values [TH] in ng/mL calculated from absorbance are shown in Figure 2C, alongside each sample ID. Raw TH concentration was divided by [Protein], then multiplied by 1,000 to produce values in pg TH/mg total protein (Figure 3C).

**Contrary to our hypothesis, monocytes isolated from blood of PD patients show increased TH protein relative to age-matched healthy controls.** PD is a disease in which monoamine signaling is affected in both CNS and peripheral immune cells<sup>9</sup>. The literature supports the hypothesis that similar to the CNS, peripheral TH expression is altered, but there is no reliable information about the direction of this change. Since peripheral immune cells such as PBMCs express the machinery for catecholamine synthesis, including TH, they provide a biologically relevant peripheral tissue preparation to investigate TH levels in monocytes of PD patients and age-matched healthy subjects. Monocytes for each subject were isolated from 20

million total peripheral blood mononuclear cells (PBMCs) using anti-CD14 magnetic isolation per manufacturer's instructions. Purified monocytes were immediately lysed and assayed *via* Bio-ELISA for TH concentration following total protein quantification. Of 11 healthy control samples included, only three registered TH concentrations above the detection threshold. By contrast, all 11 PD patients recruited for this study show clear positive TH values that were significantly higher than healthy controls. These data suggest that, contrary to our original hypothesis, PD monocytes express significantly more TH protein relative to healthy control subjects (Fig 4A -  $n=11$ ,  $t[20]=3.777$ ,  $P=0.0012$ ). While these data represent a snapshot of TH levels in circulation PD monocytes, we cannot make any overarching claims that TH levels in monocytes precede clinical symptoms of PD, or predict a PD diagnosis. A larger sample numbers and longitudinal studies can test these possibilities. Nevertheless, these data suggest that in peripheral monocytes of Parkinson's patients, the rate limiting protein involved in catecholamines synthesis is increased. Investigating the potential mechanism was the focus of the next set of experiments.

**TNF increases number of TH+ monocytes, and the amount of TH protein per monocyte.**

There is strong evidence in the literature for increased TNF in PD<sup>19,21-23</sup> including in the brain, cerebrospinal fluid, and serum of Parkinson's patients<sup>19</sup> as well as in Parkinsonian mice<sup>24,25</sup>. These reports suggest that TNF plays a role in the often hypothesized peripheral inflammation in PD<sup>58-63</sup>, which is also documented in other inflammatory states such as rheumatoid arthritis<sup>64,65</sup> and multiple sclerosis<sup>7</sup>, where TH expression is linked to TNF expression<sup>64,65,7</sup>. Therefore, we tested the hypothesis that *ex vivo* stimulation of monocytes from healthy subjects with TNF stimulates TH expression, as measured by changes in the number of TH-expressing monocytes, and/or the amount of TH per monocyte. We employed flow cytometry to address the former, and bio-ELISA to address the latter. Two million monocytes isolated from whole blood of healthy donors were treated for 4 hours with tissue plasminogen activator (TPA, 100ng/mL, positive control for increased monocyte TH expression<sup>7</sup>), TNF (17ng/mL)<sup>48</sup> and compared with

monocytes treated with vehicle (Figure 5A). Monocytes were assayed for TH expression by two complementary methods: flow cytometry<sup>38</sup> (Figure 5B-F) and ELISA (Figure 5G-H).

To control for donor variability, we added identical quantities of counting beads as a reference. The number of TH<sup>+</sup> monocytes was quantified by flow cytometry (Figure 5B, left) in two experimental groups: TPA-treated and TNF-treated. Monocytes in each condition were gated to isolate single cells expressing TH (Figure 5B). Raw counts of monocytes in each condition revealed increased monocytes expressing TH after treatment with TPA or TNF (Figure 5D), while the number of TH<sup>+</sup> monocytes per microliter (Figure 5C) are significantly increased relative to vehicle (Figure 5E; N=3,  $F(2,6)=0.364$ ,  $p=0.0018$ ), suggesting that the number of TH<sup>+</sup> monocytes increase following treatment with TNF or positive TPA control. A possible mechanism for this observation is either monocyte proliferation during the treatment period or an altered monocyte phenotype in response to TNF, with no change in total number of monocytes. In other words, following TNF treatment, TH<sup>+</sup> monocytes may either be increasing in number (proliferation) or existing monocytes upregulate TH expression and become TH<sup>+</sup> (phenotypic change). While a four-hour exposure to TNF is an insufficient time period to induce proliferative events in immune cells<sup>74</sup>, we could not confidently rule out these possibilities without additional analyses. Therefore, we quantified monocyte proliferation by comparing the total number of monocytes per microliter of untreated vs. TNF treated experimental group. We found the total number of monocytes per microliter to be unchanged (Figure 5F). While these results suggest that monocyte proliferation did not occur in response to TNF, the results of simple cell counts are not definitive. We elected to take a more rigorous approach and assess Ki67 expression as a measure of cell proliferation<sup>66</sup>. Ki67 expression in TNF treated monocytes relative to vehicle-treated controls revealed no change in Ki67 expression following TNF treatment (Figure 5I). Thus, these results showed phenotypic changes in monocytes, but not cell proliferation in response to TNF. While this finding explains our earlier observation of



increased numbers of TH<sup>+</sup> cells, the potential phenotypic shift following TNF mediated immune stimulation was an unpredicted and novel finding.

Our flow cytometry data strongly support the conclusion that TNF increases numbers of TH<sup>+</sup> monocytes, but increased number of TH<sup>+</sup> monocytes could be due to increased numbers of cells expressing TH protein, increased quantity of TH protein per cell, or both. In order to determine whether or not TNF treatment increases quantity of TH protein per monocyte, identically treated monocytes were lysed and assayed using our TH Bio-ELISA. We found that four-hour treatments with TNF significantly increased the amount of TH protein (picogram TH per milligram total protein) above both vehicle and the positive control group (TPA treatment; Figure 5G; n=5-6 per group,  $F(2,15)=3.297$ ,  $p=0.0001$ ), indicating that exposure to TNF is sufficient to increase TH protein in human monocytes. Overall, our data show that TNF increases both the number of monocytes expressing TH and the quantity of TH expressed by each cell.

**Inhibition of TNF blocks increase in number of TH<sup>+</sup> monocytes and amount of TH per monocyte.** To determine the specificity of TNF regulation of TH in monocytes, we employed two approaches. We investigated whether inhibition of TNF signaling attenuates or blocks the TNF mediated increase in TH. In addition, we asked whether or not interleukin-6 (IL6), a cytokine with pleiotropic effects<sup>67</sup> that is also increased in PD<sup>68-70</sup>, and is associated with non-motor symptoms of PD<sup>68-70</sup> can also regulate TH expression in the peripheral monocytes. To test these possibilities, we investigated whether XPro1595, a TNF inhibitor<sup>71,72</sup>, reduces monocyte TH expression relative to TNF treatment alone. In parallel experiments, monocytes were treated with IL6. Two million monocytes isolated from whole blood of healthy donors (Figure 6A) were treated with XPro1595 alone (50ng/mL), TNF (17ng/mL) or TNF plus XPro1595 (Figure 6B), IL6 alone (17ng/mL) or IL6 plus XPro1595. The cells were subjected to flow cytometry or Bio-ELISA. Consistent with the literature<sup>67</sup>, we found relative to TNF treatment alone, XPro1595 inhibition of TNF reduced both the number of TH<sup>+</sup> monocytes and

the quantity of TH per monocyte (Figure 6C and D), suggesting that soluble TNF mediates increased TH in human monocytes. As shown in Figure 6C and 6D, IL6 neither changed the number of TH<sup>+</sup> monocytes nor the quantity of TH per monocyte. We should note that our data show that TNF is capable of regulating TH in monocytes whereas other elevated cytokines, such as IL6, are not. Since we have not tested the effect of additional, non-upregulated cytokines, we cannot claim that what we have shown in this study is exclusively mediated by TNF. Instead, we only claim that TNF is capable of regulating monocytic TH. In addition, while we have not investigated the direct link between increased TH protein in PD monocytes and TNF, our *ex vivo* data (Figure 5) support the interpretation that TNF plays a role in increased TH expression in immune cells of PD patients.

### **Concluding remarks**

We developed a highly reproducible and quantitative Bio-ELISA to measure TH protein levels in murine and human cells. Following validation of our assay in multiple TH expression systems, we investigated TH expression in PD immune cells and of age-matched healthy control subjects. We observed that PD patients' monocytes expressed significantly greater amounts of TH per monocyte. Inspired by the literature indicating increased TNF in PD, we uncovered an intriguing link between TNF stimulation and increased TH expression in healthy monocytes, which is attenuated by treatment with TNF inhibitor Xpro1595. Given that TH expression and catecholamine release has been shown to be associated with an anti-inflammatory effect and can mitigate TNF mediated inflammation, we posit that increased TH expression in monocytes in response to elevated TNF is a compensatory mechanism. This observation is a step towards understanding the potential underlying mechanism and functional consequence of changes in catecholamines in peripheral immune system in PD. Nevertheless, we acknowledge that one of the limitations of this study was the infeasibility of quantifying TNF responses in PD monocytes. Whereas, TH can be quantified in a 30 mL blood sample (Figures 3 and 4), for functional assays (Figures 5 and 6) a large blood volume (~500 mL) is required,

which is not feasible in PD subjects. In addition, our data represent merely a snapshot of TH levels present in circulating PD monocytes at a single timepoint; we do not make any claims that elevated levels of TH expressing monocytes precede or predict PD. Larger sample numbers and longitudinal studies can test these possibilities. Nonetheless, the current results raise many interesting questions: Do the circulating TH expressing monocytes reflect changes in central dopamine? Does effective PD therapy reduce the level of TH in peripheral immune cells? Does elevated TH in monocytes predict PD onset or its progression? Future studies will examine these questions and the connections between the peripheral immune system to the brain.

## **Figure 1. Establishing a reproducible quantitative Bio-ELISA to detect Tyrosine**

**Hydroxylase.** A-D) TH is detectable in recombinant form and in PC12 crude lysate using affinity purified rabbit polyclonal TH antibody AB152 (Sigma), and antibodies selected for this ELISA, mouse monoclonal MCA-4H2 (EnCor) and rabbit polyclonal RPCA-TH (EnCor). E) We probed the lower threshold for TH detection *via* serial dilution of purified recombinant TH from 6ug/mL to 0.094ug/mL followed by Western blot and near-Infrared detection, considered to be a sensitive method for protein detection on Western blot. We demonstrate IR detection is reliable to a lower threshold of ~15ng TH. Below this limit, TH detection becomes unreliable with IR detection. F-H) In a series of stepwise experiments designed to increase ELISA sensitivity and decrease background, we achieved lower detection limits of 15pg/mL TH (G). Capture antibody and detection antibody in all three methods were MCA-4H2 (1:1,000 dilution from 1mg/mL) and RPCA-TH (1:6,000 dilution from 1mg/mL). Schematic representation of each method shown on the left with representative standard curve on the right. E) Incubation with detection antibody followed by an HRP-conjugate secondary yielded a lower detection threshold of 125pg/mL. F) Addition of a tertiary layer using anti-rabbit biotin followed by Avidin-HRP improved lower detection threshold to 62.5pg/mL but resulted in increased background. G) Use of biotinylated detection antibody (RPCA-TH-biotin, 1:6,000 dilution from 1.65mg/mL) followed by avidin-HRP yielded the lowest detection threshold of 15 pg/mL, with maximum sensitivity and minimal background. Inset (red outline) shows magnified lower standard curve to illustrate high sensitivity.

## **Figure 2. Antibodies MCA-4H2 and RPCA-TH reliably detect both native and denatured**

**TH in mouse and human tissue.** Human and murine brain sections (40um) were permeabilized, blocked and stained with primary antibodies (MCA-4H2 and RPCA-TH) followed by HRP-conjugated secondaries and detected using diaminobenzidine enhanced with nickel (NiDAB, grey-black). A) MCA-4H2 stains neuromelanin-expressing (brown) TH positive midbrain neurons and neuronal processes (grey-black) with no non-specific staining (secondary only, top

panel) in both human and murine tissues. B) RPCA-TH shows similar highly specific staining of midbrain TH positive neurons, confirming antibody specificity. A & B) Human midbrain tissues shown as secondary-only controls exhibit endogenous neuromelanin (brown), not to be confused with immunostaining. C) Western blot analyses of murine and human striatal tissues reveal similarly specific detection of TH (~63kDa band) in both mouse and human, with minimal non-specific staining in negative control homogenate (parental CHO cell homogenate). (Left – MCA-4H2, right – RPCA-TH).

**Figure 3. Bio-ELISA reliably quantifies TH in PC12 cells, human macrophages and cultured murine dopamine neurons.**

A) Using the Bio-ELISA shown in Figure 1G, we quantified TH in four relevant tissues and cultured cells: PC12 (positive control), HEK293 (negative control), cultured human macrophages and cultured primary murine dopamine neurons. PC12 cells express very high levels of TH (<10ng TH / mg total protein) relative to human macrophages (~300 pg TH / mg total protein) and primary murine dopamine neurons (~700 pg TH / mg total protein). B) TH values are plotted on a representative standard curve for visual comparison, with inset magnifying the lower end of the standard curve. C) Calculations are shown by which raw TH concentration in ng/mL is normalized to total protein per sample. Samples included in A, each an independent biological replicate, are shown in C.

**Figure 4. TH protein is increased in CD14+ monocytes isolated from PD patients.** Total CD14+ monocytes were magnetically isolated from 20 million freshly isolated PBMCs derived from whole blood of 11 PD patients and 11 healthy volunteers, immediately lysed in the presence of protease inhibitor and stored at -80°C. Following protein quantification, whole lysate from each sample was added to duplicate wells and assayed for concentration of TH. A) Monocytes isolated from PD patients express significantly greater quantity of TH compared to equivalent monocytes isolated from healthy control subjects (unpaired two-tailed T-test,  $\alpha=0.05$ ,  $p<0.05$ ) B) Mean TH concentration for monocytes from PD patients plotted on a

representative standard curve, with inset magnifying the lower end of the curve. C) Calculations are shown by which raw TH concentration in ng/mL is normalized to total protein per sample. Samples included in A, each an independent biological replicate, are shown in C.

**Figure 5. TNF increases number of TH+ monocytes and amount of TH protein per**

**monocyte.** A) Total CD14+ monocytes were isolated using negative magnetic selection from 80 million healthy donor PBMCs. Monocytes were seeded into a 6-well ultra-low-adherence plate at 2 million cells per well, and treated with vehicle (media), TPA (100ng/mL, positive control), TNF (17ng/mL), in duplicate. B) One duplicate was assayed by flow cytometry to detect TH-expressing monocytes, using counting beads as a reference value to quantify the number of TH+ cells. C) Number of TH+ cells were quantified as shown. D) Representative histogram showing one set of samples assayed for TH expressing monocytes following stimulation. E) Both TPA and TNF induced significant increases in TH-expressing monocytes relative to vehicle, shown as fold-increase relative to vehicle (n=3 per group, one-way ANOVA, p<0.01). F) No increase in total monocytes per condition, relative to vehicle (n=3 per group, one-way ANOVA, n.s.). G) TH concentration in picograms per milligram total protein shows TNF treatment results in significantly increased TH protein relative to vehicle and TPA (n=5-6 per group, one-way ANOVA, p<0.001). H) Mean TH protein level for monocytes treated with vehicle, TPA and TNF are plotted on a representative standard curve, with the inset magnifying the lower end of the curve. I) Intracellular flow cytometry for Ki67 does not reveal significant differences between vehicle and TNF treatment groups, confirming a lack of cell proliferation following TNF treatment.

**Figure 6. Inhibition of TNF blocks increase in number of TH+ monocytes and amount of**

**TH per monocyte.** A-B) Acutely isolated monocytes from three healthy donors were seeded at 2 million cells per well in duplicate ultra-low-adherence plates, and treated with TNF (17ng/mL), XPro1595 (50ng/mL), IL6 (17ng/mL) or combinations thereof as indicated. C) In samples assayed by flow cytometry, using counting beads as a reference value to quantify the number of

TH+ cells, co-incubation with TNF and XPro1595 significantly reduced the number of TH+ monocytes relative to TNF treatment alone. Treatment with IL6 or IL6 + XPro1595 resulted in no significant change in the number of TH+ monocytes. Values are represented as fold change relative to vehicle (n=3 per group, one way ANOVA, \*P<0.05, \*\*P<0.01). D) TH concentration (picogram per milligram total protein) significantly increases upon TNF treatment, and is reduced significantly to baseline levels following co-incubation with TNF and XPro1595. Neither IL6 nor IL6+XPro1595 significantly increased TH quantity (n=3 per group, one way ANOVA, \*P<0.05).

### **Data Availability**

All data will be made available upon reasonable request.

### **Author Contributions**

M.F., M.B., G.S., A.C., D.R.M., C.A.H., A.D, and A.G., performed experiments, contributed written portions, figures and methods to this manuscript. P.M., M.G.T., I.M., A.R.Z., M.S.O., W.J.S., H.K., and A.G., supervised, designed experiments in addition to direct contributions to the manuscript.

**Funding:** This work was funded by T32-NS082128 (to A.G.), National Center for Advancing Translational Sciences of the National Institutes of Health under University of Florida Clinical and Translational Science Awards TL1TR001428 and UL1TR001427 (to A.G.), R01NS071122-07A1 (to H. K.), NIDA Grant R01DA026947-10, National Institutes of Health Office of the Director Grant 1S10OD020026-01 (to H. K.), UF-Fixel Institute Developmental Fund, DA043895 (to H.K.), by the University of Florida McKnight Brain Institute (MBI) (to A.G.), by the Bryan Robinson Foundation (to A.G.) and by The Karen Toffler Charitable Trust (to A.G.).

The authors declare that they have no conflicts of interest with the contents of this article. The content is solely the responsibility of the authors and does not necessarily represent the official views of the National Institutes of Health.

## References

- 1 Molinoff, P. B. & Axelrod, J. Biochemistry of catecholamines. *Annu Rev Biochem* **40**, 465-500, doi:10.1146/annurev.bi.40.070171.002341 (1971).
- 2 Nagatsu, T., Levitt, M. & Udenfriend, S. TYROSINE HYDROXYLASE. THE INITIAL STEP IN NOREPINEPHRINE BIOSYNTHESIS. *J Biol Chem* **239**, 2910-2917 (1964).
- 3 Berod, A., Biguet, N. F., Dumas, S., Bloch, B. & Mallet, J. Modulation of tyrosine hydroxylase gene expression in the central nervous system visualized by in situ hybridization. *Proc Natl Acad Sci U S A* **84**, 1699-1703, doi:10.1073/pnas.84.6.1699 (1987).
- 4 Bertler, A. & Rosengren, E. Occurrence and distribution of catechol amines in brain. *Acta Physiol Scand* **47**, 350-361 (1959).
- 5 Marino, F. *et al.* Endogenous catecholamine synthesis, metabolism storage, and uptake in human peripheral blood mononuclear cells. *Exp Hematol* **27**, 489-495 (1999).
- 6 Cosentino, M. *et al.* Endogenous catecholamine synthesis, metabolism, storage and uptake in human neutrophils. *Life Sci* **64**, 975-981, doi:10.1016/s0024-3205(99)00023-5 (1999).
- 7 Cosentino, M. *et al.* Catecholamine production and tyrosine hydroxylase expression in peripheral blood mononuclear cells from multiple sclerosis patients: effect of cell stimulation and possible relevance for activation-induced apoptosis. *J Neuroimmunol* **133**, 233-240, doi:10.1016/s0165-5728(02)00372-7 (2002).
- 8 Cosentino, M. *et al.* Interferon-gamma and interferon-beta affect endogenous catecholamines in human peripheral blood mononuclear cells: implications for multiple sclerosis. *J Neuroimmunol* **162**, 112-121, doi:10.1016/j.jneuroim.2005.01.019 (2005).
- 9 Matt, S. M. & Gaskill, P. J. Where Is Dopamine and how do Immune Cells See it?: Dopamine-Mediated Immune Cell Function in Health and Disease. *J Neuroimmune Pharmacol*, doi:10.1007/s11481-019-09851-4 (2019).
- 10 Weihe, E., Depboylu, C., Schütz, B., Schäfer, M. K. & Eiden, L. E. Three types of tyrosine hydroxylase-positive CNS neurons distinguished by dopa decarboxylase and VMAT2 co-expression. *Cell Mol Neurobiol* **26**, 659-678, doi:10.1007/s10571-006-9053-9 (2006).
- 11 Harris, R. C. & Zhang, M. Z. Dopamine, the kidney, and hypertension. *Curr Hypertens Rep* **14**, 138-143, doi:10.1007/s11906-012-0253-z (2012).
- 12 Wolfowitz, E. *et al.* Derivation of urinary dopamine from plasma dihydroxyphenylalanine in humans. *Clin Sci (Lond)* **84**, 549-557, doi:10.1042/cs0840549 (1993).
- 13 Mohanty, P. K. *et al.* Myocardial norepinephrine, epinephrine and dopamine concentrations after cardiac autotransplantation in dogs. *J Am Coll Cardiol* **7**, 419-424, doi:10.1016/s0735-1097(86)80515-0 (1986).
- 14 Phaner, M. J., Galligan, J. J. & Swain, G. M. Increased catecholamine secretion from single adrenal chromaffin cells in DOCA-salt hypertension is associated with potassium channel dysfunction. *ACS Chem Neurosci* **4**, 1404-1413, doi:10.1021/cn400115v (2013).
- 15 Leszczyszyn, D. J. *et al.* Secretion of catecholamines from individual adrenal medullary chromaffin cells. *J Neurochem* **56**, 1855-1863, doi:10.1111/j.1471-4159.1991.tb03441.x (1991).
- 16 Wightman, R. M. *et al.* Temporally resolved catecholamine spikes correspond to single vesicle release from individual chromaffin cells. *Proc Natl Acad Sci U S A* **88**, 10754-10758, doi:10.1073/pnas.88.23.10754 (1991).
- 17 Gaskill, P. J., Carvallo, L., Eugenin, E. A. & Berman, J. W. Characterization and function of the human macrophage dopaminergic system: implications for CNS disease and drug abuse. *J Neuroinflammation* **9**, 203, doi:10.1186/1742-2094-9-203 (2012).



- 18 Cosentino, M. *et al.* Human CD4+CD25+ regulatory T cells selectively express tyrosine hydroxylase and contain endogenous catecholamines subserving an autocrine/paracrine inhibitory functional loop. *Blood* **109**, 632-642, doi:10.1182/blood-2006-01-028423 (2007).
- 19 Mogi, M. *et al.* Tumor necrosis factor-alpha (TNF-alpha) increases both in the brain and in the cerebrospinal fluid from parkinsonian patients. *Neurosci Lett* **165**, 208-210, doi:10.1016/0304-3940(94)90746-3 (1994).
- 20 Hirsch, E. C. *et al.* The role of glial reaction and inflammation in Parkinson's disease. *Ann N Y Acad Sci* **991**, 214-228, doi:10.1111/j.1749-6632.2003.tb07478.x (2003).
- 21 Kouchaki, E. *et al.* Increased serum levels of TNF-alpha and decreased serum levels of IL-27 in patients with Parkinson disease and their correlation with disease severity. *Clin Neurol Neurosurg* **166**, 76-79, doi:10.1016/j.clineuro.2018.01.022 (2018).
- 22 Rathnayake, D., Chang, T. & Udagama, P. Selected serum cytokines and nitric oxide as potential multi-marker biosignature panels for Parkinson disease of varying durations: a case-control study. *BMC Neurol* **19**, 56, doi:10.1186/s12883-019-1286-6 (2019).
- 23 Qin, X. Y., Zhang, S. P., Cao, C., Loh, Y. P. & Cheng, Y. Aberrations in Peripheral Inflammatory Cytokine Levels in Parkinson Disease: A Systematic Review and Meta-analysis. *JAMA Neurol* **73**, 1316-1324, doi:10.1001/jamaneurol.2016.2742 (2016).
- 24 McCoy, M. K. & Tansey, M. G. TNF signaling inhibition in the CNS: implications for normal brain function and neurodegenerative disease. *J Neuroinflammation* **5**, 45, doi:10.1186/1742-2094-5-45 (2008).
- 25 McCoy, M. K. *et al.* Blocking soluble tumor necrosis factor signaling with dominant-negative tumor necrosis factor inhibitor attenuates loss of dopaminergic neurons in models of Parkinson's disease. *J Neurosci* **26**, 9365-9375, doi:10.1523/JNEUROSCI.1504-06.2006 (2006).
- 26 Lee, J. K., Tran, T. & Tansey, M. G. Neuroinflammation in Parkinson's disease. *J Neuroimmune Pharmacol* **4**, 419-429, doi:10.1007/s11481-009-9176-0 (2009).
- 27 Su, X. *et al.* Synuclein activates microglia in a model of Parkinson's disease. *Neurobiol Aging* **29**, 1690-1701, doi:10.1016/j.neurobiolaging.2007.04.006 (2008).
- 28 Block, M. L. & Hong, J. S. Microglia and inflammation-mediated neurodegeneration: multiple triggers with a common mechanism. *Prog Neurobiol* **76**, 77-98, doi:10.1016/j.pneurobio.2005.06.004 (2005).
- 29 Kim, Y. S. & Joh, T. H. Microglia, major player in the brain inflammation: their roles in the pathogenesis of Parkinson's disease. *Exp Mol Med* **38**, 333-347, doi:10.1038/emmm.2006.40 (2006).
- 30 Mackie, P. *et al.* The dopamine transporter: An unrecognized nexus for dysfunctional peripheral immunity and signaling in Parkinson's Disease. *Brain Behav Immun* **70**, 21-35, doi:10.1016/j.bbi.2018.03.020 (2018).
- 31 Braak, H. & Del Tredici, K. Invited Article: Nervous system pathology in sporadic Parkinson disease. *Neurology* **70**, 1916-1925, doi:10.1212/01.wnl.0000312279.49272.9f (2008).
- 32 Graham, F. L., Smiley, J., Russell, W. C. & Nairn, R. Characteristics of a human cell line transformed by DNA from human adenovirus type 5. *J Gen Virol* **36**, 59-74, doi:10.1099/0022-1317-36-1-59 (1977).
- 33 Goodwin, J. S. *et al.* Amphetamine and methamphetamine differentially affect dopamine transporters in vitro and in vivo. *J Biol Chem* **284**, 2978-2989, doi:10.1074/jbc.M805298200 (2009).
- 34 Saha, K. *et al.* Intracellular methamphetamine prevents the dopamine-induced enhancement of neuronal firing. *J Biol Chem* **289**, 22246-22257, doi:10.1074/jbc.M114.563056 (2014).
- 35 Greene, L. A. & Tischler, A. S. Establishment of a noradrenergic clonal line of rat adrenal pheochromocytoma cells which respond to nerve growth factor. *Proc Natl Acad Sci U S A* **73**, 2424-2428, doi:10.1073/pnas.73.7.2424 (1976).

- 36 Cartier, E. A. *et al.* A biochemical and functional protein complex involving dopamine synthesis and transport into synaptic vesicles. *J Biol Chem* **285**, 1957-1966, doi:10.1074/jbc.M109.054510 (2010).
- 37 Swant, J. *et al.* alpha-Synuclein stimulates a dopamine transporter-dependent chloride current and modulates the activity of the transporter. *J Biol Chem* **286**, 43933-43943, doi:10.1074/jbc.M111.241232 (2011).
- 38 Gopinath, A. *et al.* A novel approach to study markers of dopamine signaling in peripheral immune cells. *J Immunol Methods* **476**, 112686, doi:10.1016/j.jim.2019.112686 (2020).
- 39 Corkum, C. P. *et al.* Immune cell subsets and their gene expression profiles from human PBMC isolated by Vacutainer Cell Preparation Tube (CPT™) and standard density gradient. *BMC Immunol* **16**, 48, doi:10.1186/s12865-015-0113-0 (2015).
- 40 Flierl, M. A., Rittirsch, D., Huber-Lang, M., Sarma, J. V. & Ward, P. A. Catecholamines-crafty weapons in the inflammatory arsenal of immune/inflammatory cells or opening pandora's box? *Mol Med* **14**, 195-204, doi:10.2119/2007-00105.Flierl (2008).
- 41 Flierl, M. A. *et al.* Upregulation of phagocyte-derived catecholamines augments the acute inflammatory response. *PLoS One* **4**, e4414, doi:10.1371/journal.pone.0004414 (2009).
- 42 Torres, K. C. *et al.* Norepinephrine, dopamine and dexamethasone modulate discrete leukocyte subpopulations and cytokine profiles from human PBMC. *J Neuroimmunol* **166**, 144-157, doi:10.1016/j.jneuroim.2005.06.006 (2005).
- 43 Kustrimovic, N. *et al.* Dopaminergic Receptors on CD4+ T Naive and Memory Lymphocytes Correlate with Motor Impairment in Patients with Parkinson's Disease. *Sci Rep* **6**, 33738, doi:10.1038/srep33738 (2016).
- 44 Bergquist, J., Tarkowski, A., Ekman, R. & Ewing, A. Discovery of endogenous catecholamines in lymphocytes and evidence for catecholamine regulation of lymphocyte function via an autocrine loop. *Proc Natl Acad Sci U S A* **91**, 12912-12916, doi:10.1073/pnas.91.26.12912 (1994).
- 45 Eugenin, E. A., Gaskill, P. J. & Berman, J. W. Tunneling nanotubes (TNT) are induced by HIV-infection of macrophages: a potential mechanism for intercellular HIV trafficking. *Cell Immunol* **254**, 142-148, doi:10.1016/j.cellimm.2008.08.005 (2009).
- 46 Nolan, R. & Gaskill, P. J. The role of catecholamines in HIV neuropathogenesis. *Brain Res* **1702**, 54-73, doi:10.1016/j.brainres.2018.04.030 (2019).
- 47 Nolan, R. A., Muir, R., Runner, K., Haddad, E. K. & Gaskill, P. J. Role of Macrophage Dopamine Receptors in Mediating Cytokine Production: Implications for Neuroinflammation in the Context of HIV-Associated Neurocognitive Disorders. *J Neuroimmune Pharmacol* **14**, 134-156, doi:10.1007/s11481-018-9825-2 (2019).
- 48 Merry, K. & Gowen, M. The transcriptional control of TGF-beta in human osteoblast-like cells is distinct from that of IL-1 beta. *Cytokine* **4**, 171-179, doi:10.1016/1043-4666(92)90052-s (1992).
- 49 Pickel, V. M., Joh, T. H., Field, P. M., Becker, C. G. & Reis, D. J. Cellular localization of tyrosine hydroxylase by immunohistochemistry. *J Histochem Cytochem* **23**, 1-12, doi:10.1177/23.1.234988 (1975).
- 50 Kastner, A., Hirsch, E. C., Herrero, M. T., Javoy-Agid, F. & Agid, Y. Immunocytochemical quantification of tyrosine hydroxylase at a cellular level in the mesencephalon of control subjects and patients with Parkinson's and Alzheimer's disease. *J Neurochem* **61**, 1024-1034, doi:10.1111/j.1471-4159.1993.tb03616.x (1993).
- 51 Yan, H. Q. *et al.* Delayed increase of tyrosine hydroxylase expression in rat nigrostriatal system after traumatic brain injury. *Brain Res* **1134**, 171-179, doi:10.1016/j.brainres.2006.11.087 (2007).
- 52 Witkovsky, P., Gabriel, R. & Krizaj, D. Anatomical and neurochemical characterization of dopaminergic interplexiform processes in mouse and rat retinas. *J Comp Neurol* **510**, 158-174, doi:10.1002/cne.21784 (2008).

- 53 Giguere, N. *et al.* Increased vulnerability of nigral dopamine neurons after expansion of their axonal arborization size through D2 dopamine receptor conditional knockout. *PLoS Genet* **15**, e1008352, doi:10.1371/journal.pgen.1008352 (2019).
- 54 Colon-Perez, L. M. *et al.* Functional connectivity, behavioral and dopaminergic alterations 24 hours following acute exposure to synthetic bath salt drug methylenedioxypyrovalerone. *Neuropharmacology* **137**, 178-193, doi:10.1016/j.neuropharm.2018.04.031 (2018).
- 55 Contini, M. & Raviola, E. GABAergic synapses made by a retinal dopaminergic neuron. *Proc Natl Acad Sci U S A* **100**, 1358-1363, doi:10.1073/pnas.0337681100 (2003).
- 56 Feinstein, P., Bozza, T., Rodriguez, I., Vassalli, A. & Mombaerts, P. Axon guidance of mouse olfactory sensory neurons by odorant receptors and the beta2 adrenergic receptor. *Cell* **117**, 833-846, doi:10.1016/j.cell.2004.05.013 (2004).
- 57 Shaw, G., Morse, S., Ararat, M. & Graham, F. L. Preferential transformation of human neuronal cells by human adenoviruses and the origin of HEK 293 cells. *Faseb j* **16**, 869-871, doi:10.1096/fj.01-0995fje (2002).
- 58 Caggiu, E. *et al.* Inflammation, Infectious Triggers, and Parkinson's Disease. *Front Neurol* **10**, 122, doi:10.3389/fneur.2019.00122 (2019).
- 59 Kozina, E. *et al.* Mutant LRRK2 mediates peripheral and central immune responses leading to neurodegeneration in vivo. *Brain* **141**, 1753-1769, doi:10.1093/brain/awy077 (2018).
- 60 Rentzos, M. *et al.* Circulating interleukin-15 and RANTES chemokine in Parkinson's disease. *Acta Neurol Scand* **116**, 374-379, doi:10.1111/j.1600-0404.2007.00894.x (2007).
- 61 Brodacki, B. *et al.* Serum interleukin (IL-2, IL-10, IL-6, IL-4), TNFalpha, and INFgamma concentrations are elevated in patients with atypical and idiopathic parkinsonism. *Neurosci Lett* **441**, 158-162, doi:10.1016/j.neulet.2008.06.040 (2008).
- 62 Dufek, M. *et al.* Serum inflammatory biomarkers in Parkinson's disease. *Parkinsonism Relat Disord* **15**, 318-320, doi:10.1016/j.parkreldis.2008.05.014 (2009).
- 63 Deleidi, M. & Gasser, T. The role of inflammation in sporadic and familial Parkinson's disease. *Cell Mol Life Sci* **70**, 4259-4273, doi:10.1007/s00018-013-1352-y (2013).
- 64 Jenei-Lanzl, Z. *et al.* Anti-inflammatory effects of cell-based therapy with tyrosine hydroxylase-positive catecholaminergic cells in experimental arthritis. *Ann Rheum Dis* **74**, 444-451, doi:10.1136/annrheumdis-2013-203925 (2015).
- 65 Miller, L. E., Grifka, J., Schölmerich, J. & Straub, R. H. Norepinephrine from synovial tyrosine hydroxylase positive cells is a strong indicator of synovial inflammation in rheumatoid arthritis. *J Rheumatol* **29**, 427-435 (2002).
- 66 Kim, K. H. & Sederstrom, J. M. Assaying Cell Cycle Status Using Flow Cytometry. *Curr Protoc Mol Biol* **111**, 28.26.21-28.26.11, doi:10.1002/0471142727.mb2806s111 (2015).
- 67 Miller, D. R. *et al.* Methamphetamine regulation of activity and topology of ventral midbrain networks. *PLoS One* **14**, e0222957, doi:10.1371/journal.pone.0222957 (2019).
- 68 Pereira, J. R. *et al.* IL-6 serum levels are elevated in Parkinson's disease patients with fatigue compared to patients without fatigue. *J Neurol Sci* **370**, 153-156, doi:10.1016/j.jns.2016.09.030 (2016).
- 69 Seppi, K. *et al.* Update on treatments for nonmotor symptoms of Parkinson's disease-an evidence-based medicine review. *Mov Disord* **34**, 180-198, doi:10.1002/mds.27602 (2019).
- 70 Lindqvist, D. *et al.* Non-motor symptoms in patients with Parkinson's disease - correlations with inflammatory cytokines in serum. *PLoS One* **7**, e47387, doi:10.1371/journal.pone.0047387 (2012).
- 71 Joers, V. *et al.* Microglia, inflammation and gut microbiota responses in a progressive monkey model of Parkinson's disease: A case series. *Neurobiol Dis* **144**, 105027, doi:10.1016/j.nbd.2020.105027 (2020).

- 72 O'Reilly, M. L. *et al.* Pharmacological Inhibition of Soluble Tumor Necrosis Factor-Alpha Two Weeks after High Thoracic Spinal Cord Injury Does Not Affect Sympathetic Hyperreflexia. *J Neurotrauma*, doi:10.1089/neu.2020.7504 (2021).

**Figure 1**

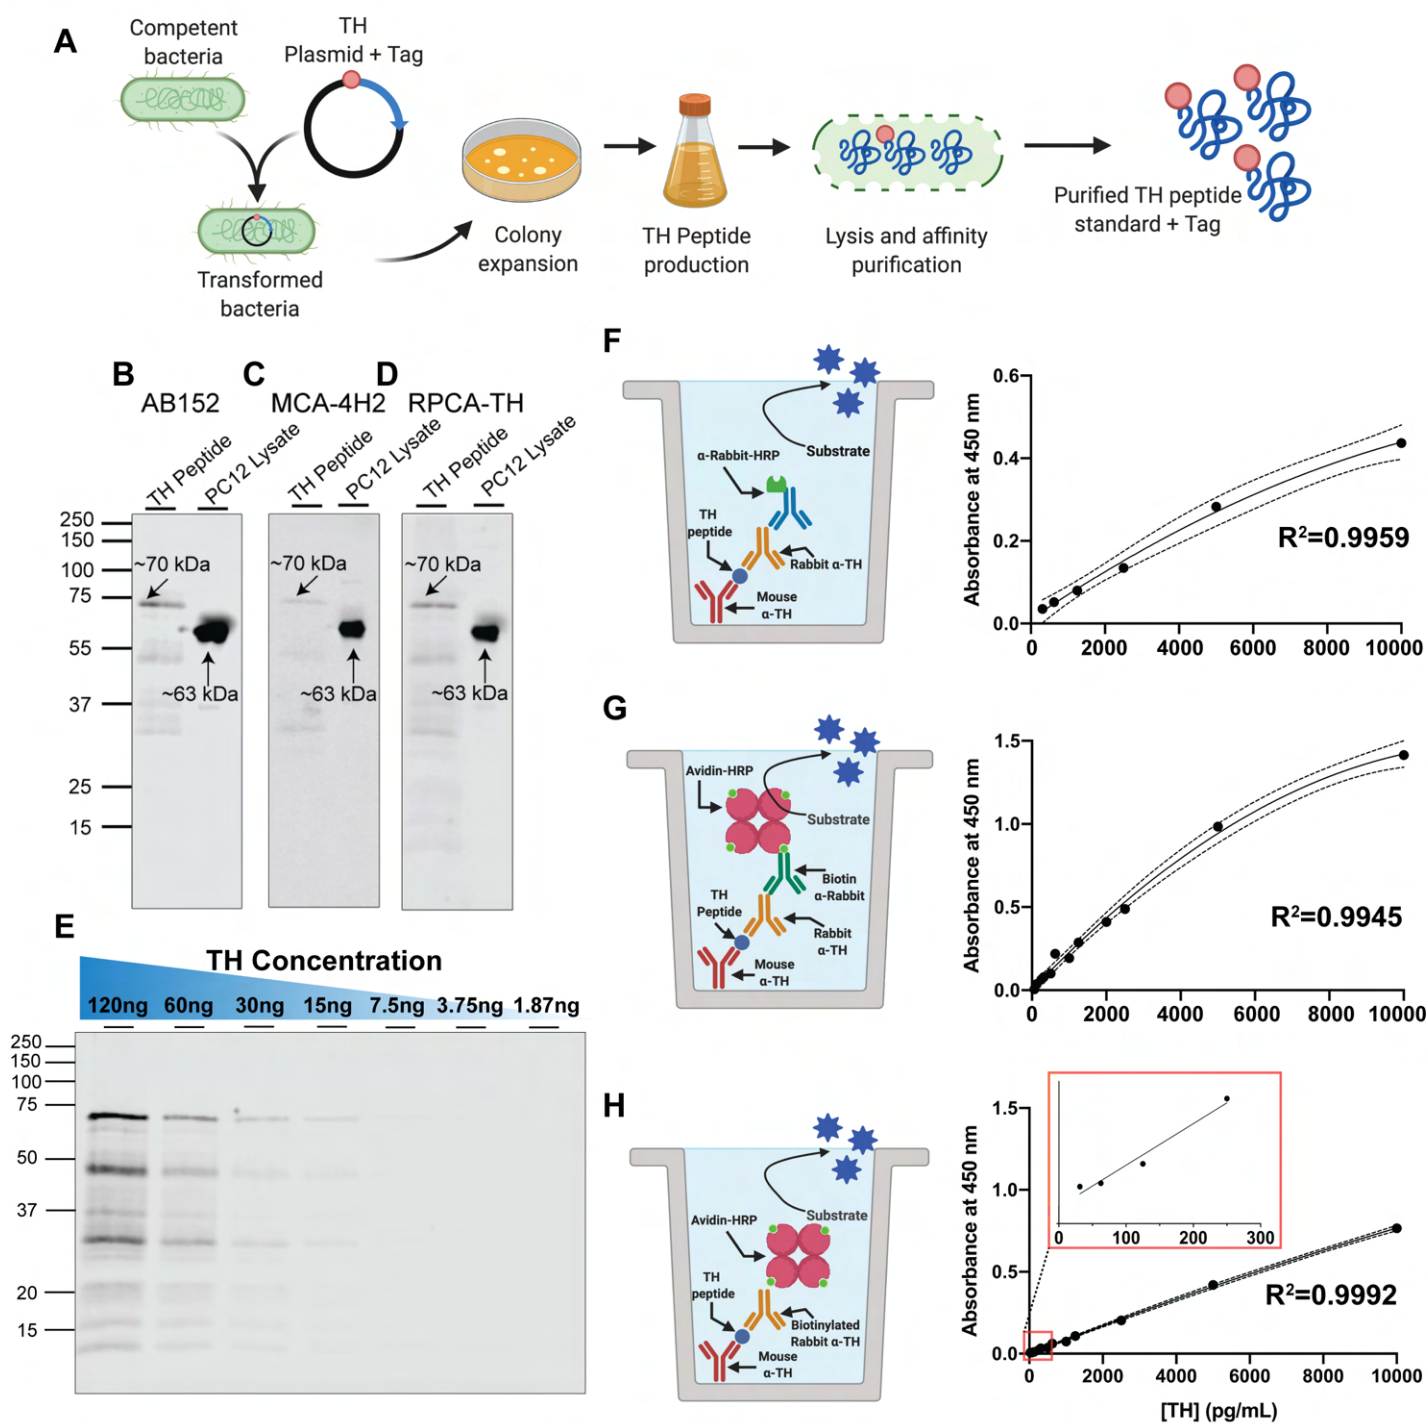

Figure 2

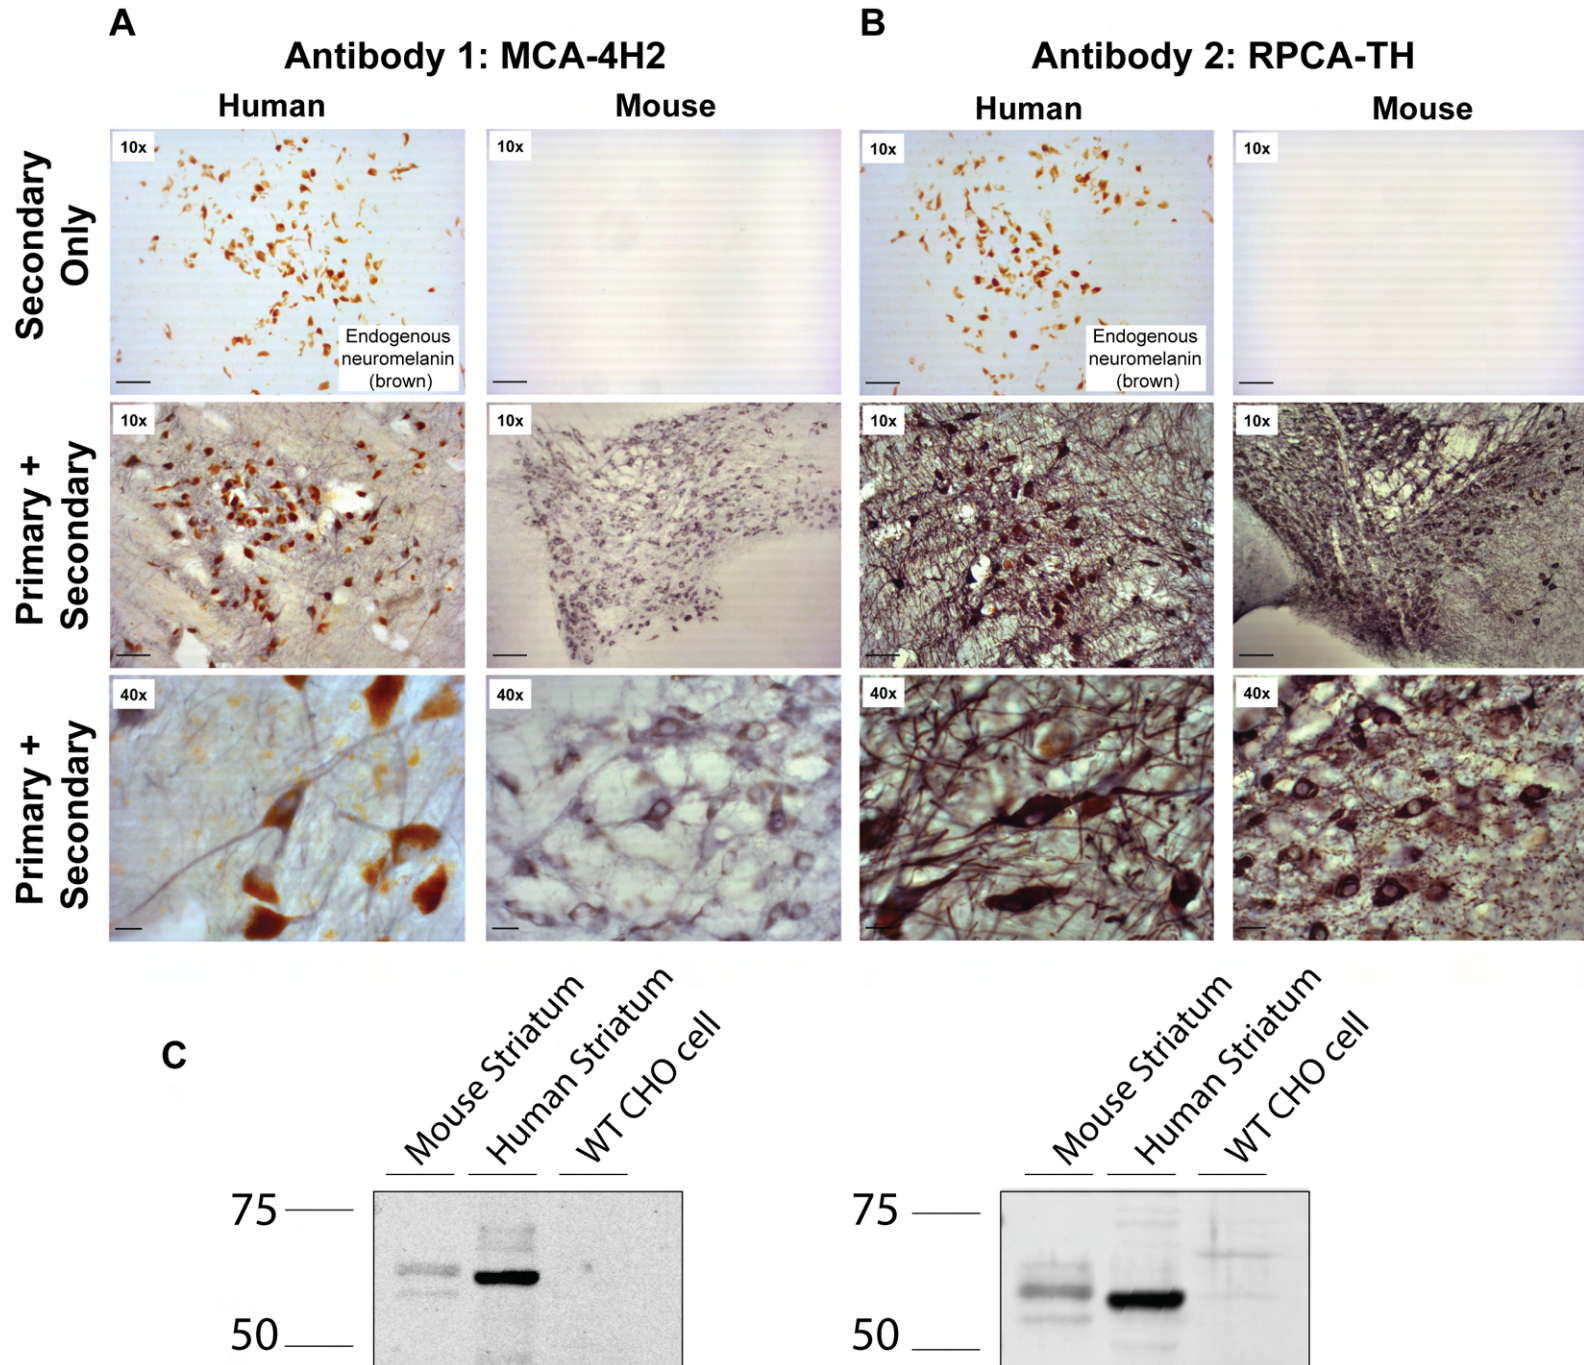

Figure 3

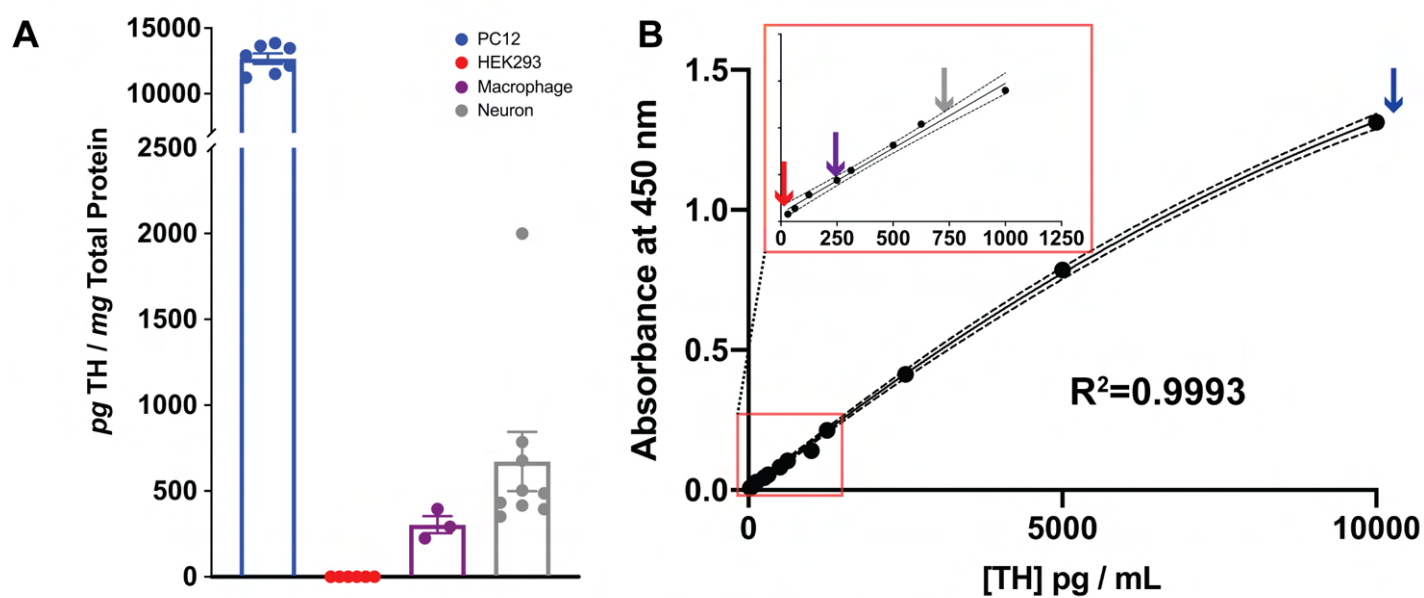

**C**

| TH Concentration Calculations in pg TH per mg Total Protein |            |                 |                    |                    |
|-------------------------------------------------------------|------------|-----------------|--------------------|--------------------|
| Sample ID                                                   | [TH] ng/mL | [Protein] mg/mL | ng TH / mg Protein | pg TH / mg Protein |
| PC12                                                        | 24.552     | 1.800           | 13.640             | 13639.816          |
| PC12                                                        | 15.365     | 1.190           | 12.911             | 12911.395          |
| PC12                                                        | 24.158     | 2.100           | 11.504             | 11503.757          |
| PC12                                                        | 20.208     | 1.800           | 11.227             | 11226.728          |
| PC12                                                        | 24.232     | 1.800           | 13.462             | 13462.029          |
| PC12                                                        | 21.850     | 1.800           | 12.139             | 12138.909          |
| PC12                                                        | 24.870     | 1.800           | 13.816             | 13816.439          |
| HEK293                                                      | N/D        | 2.900           | N/D                | N/D                |
| HEK293                                                      | N/D        | 1.000           | N/D                | N/D                |
| HEK293                                                      | N/D        | 1.000           | N/D                | N/D                |
| HEK293                                                      | N/D        | 1.000           | N/D                | N/D                |
| HEK293                                                      | N/D        | 1.000           | N/D                | N/D                |
| HEK293                                                      | N/D        | 1.000           | N/D                | N/D                |
| Macrophage                                                  | 0.130      | 0.446           | 0.292              | 292.087            |
| Macrophage                                                  | 0.144      | 0.646           | 0.224              | 223.685            |
| Macrophage                                                  | 0.759      | 1.920           | 0.395              | 395.295            |
| Neuron                                                      | 0.568      | 1.439           | 0.395              | 394.782            |
| Neuron                                                      | 0.397      | 0.920           | 0.432              | 431.783            |
| Neuron                                                      | 0.321      | 0.913           | 0.352              | 351.731            |
| Neuron                                                      | 0.259      | 0.624           | 0.416              | 415.677            |
| Neuron                                                      | 0.375      | 0.772           | 0.486              | 486.432            |
| Neuron                                                      | 0.303      | 0.601           | 0.503              | 503.478            |
| Neuron                                                      | 0.542      | 0.801           | 0.677              | 676.852            |
| Neuron                                                      | 0.234      | 0.298           | 0.785              | 785.289            |
| Neuron                                                      | 1.897      | 0.949           | 1.999              | 1999.383           |

Figure 4

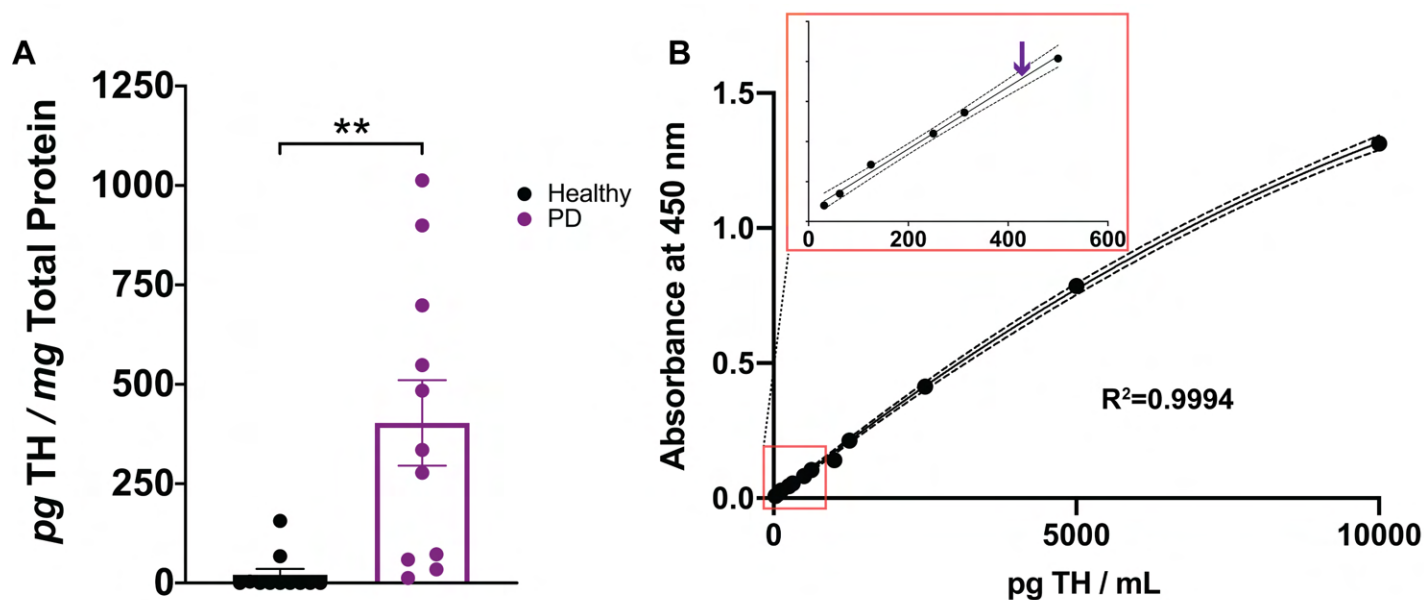

**C**

TH concentration in monocytes of Parkinson's disease patients relative to healthy controls

| Sample ID | [TH] ng/mL | [Protein] mg/mL | ng TH / mg Protein | pg TH / mg Protein |
|-----------|------------|-----------------|--------------------|--------------------|
| PD149     | 0.121      | 1.689           | 0.072              | 71.827             |
| PD150     | 0.086      | 1.460           | 0.059              | 58.651             |
| PD151     | 0.050      | 1.460           | 0.034              | 34.213             |
| PD154     | 0.340      | 1.225           | 0.278              | 277.646            |
| PD155     | 0.034      | 2.728           | 0.013              | 12.525             |
| PD161     | 1.507      | 1.676           | 0.900              | 899.557            |
| PD163     | 1.796      | 1.773           | 1.013              | 1012.918           |
| PD164     | 1.137      | 2.074           | 0.548              | 548.146            |
| PD165     | 1.713      | 2.452           | 0.699              | 698.632            |
| PD166     | 1.013      | 2.093           | 0.484              | 484.033            |
| PD167     | 0.643      | 1.918           | 0.335              | 334.909            |
| HC1       | 0.099      | 1.471           | 0.067              | 67.305             |
| HC2       | 0.007      | 2.040           | 0.004              | 3.590              |
| HC3       | N/D        | 1.209           | N/D                | N/D                |
| HC4       | N/D        | 1.047           | N/D                | N/D                |
| HC5       | N/D        | 1.809           | N/D                | N/D                |
| HC6       | N/D        | 1.671           | N/D                | N/D                |
| HC7       | N/D        | 1.178           | N/D                | N/D                |
| HC8       | N/D        | 2.164           | N/D                | N/D                |
| HC9       | 0.272      | 1.744           | 0.156              | 155.893            |
| HC10      | N/D        | 2.181           | N/D                | N/D                |
| HC11      | N/D        | 2.229           | N/D                | N/D                |



**Figure 5**

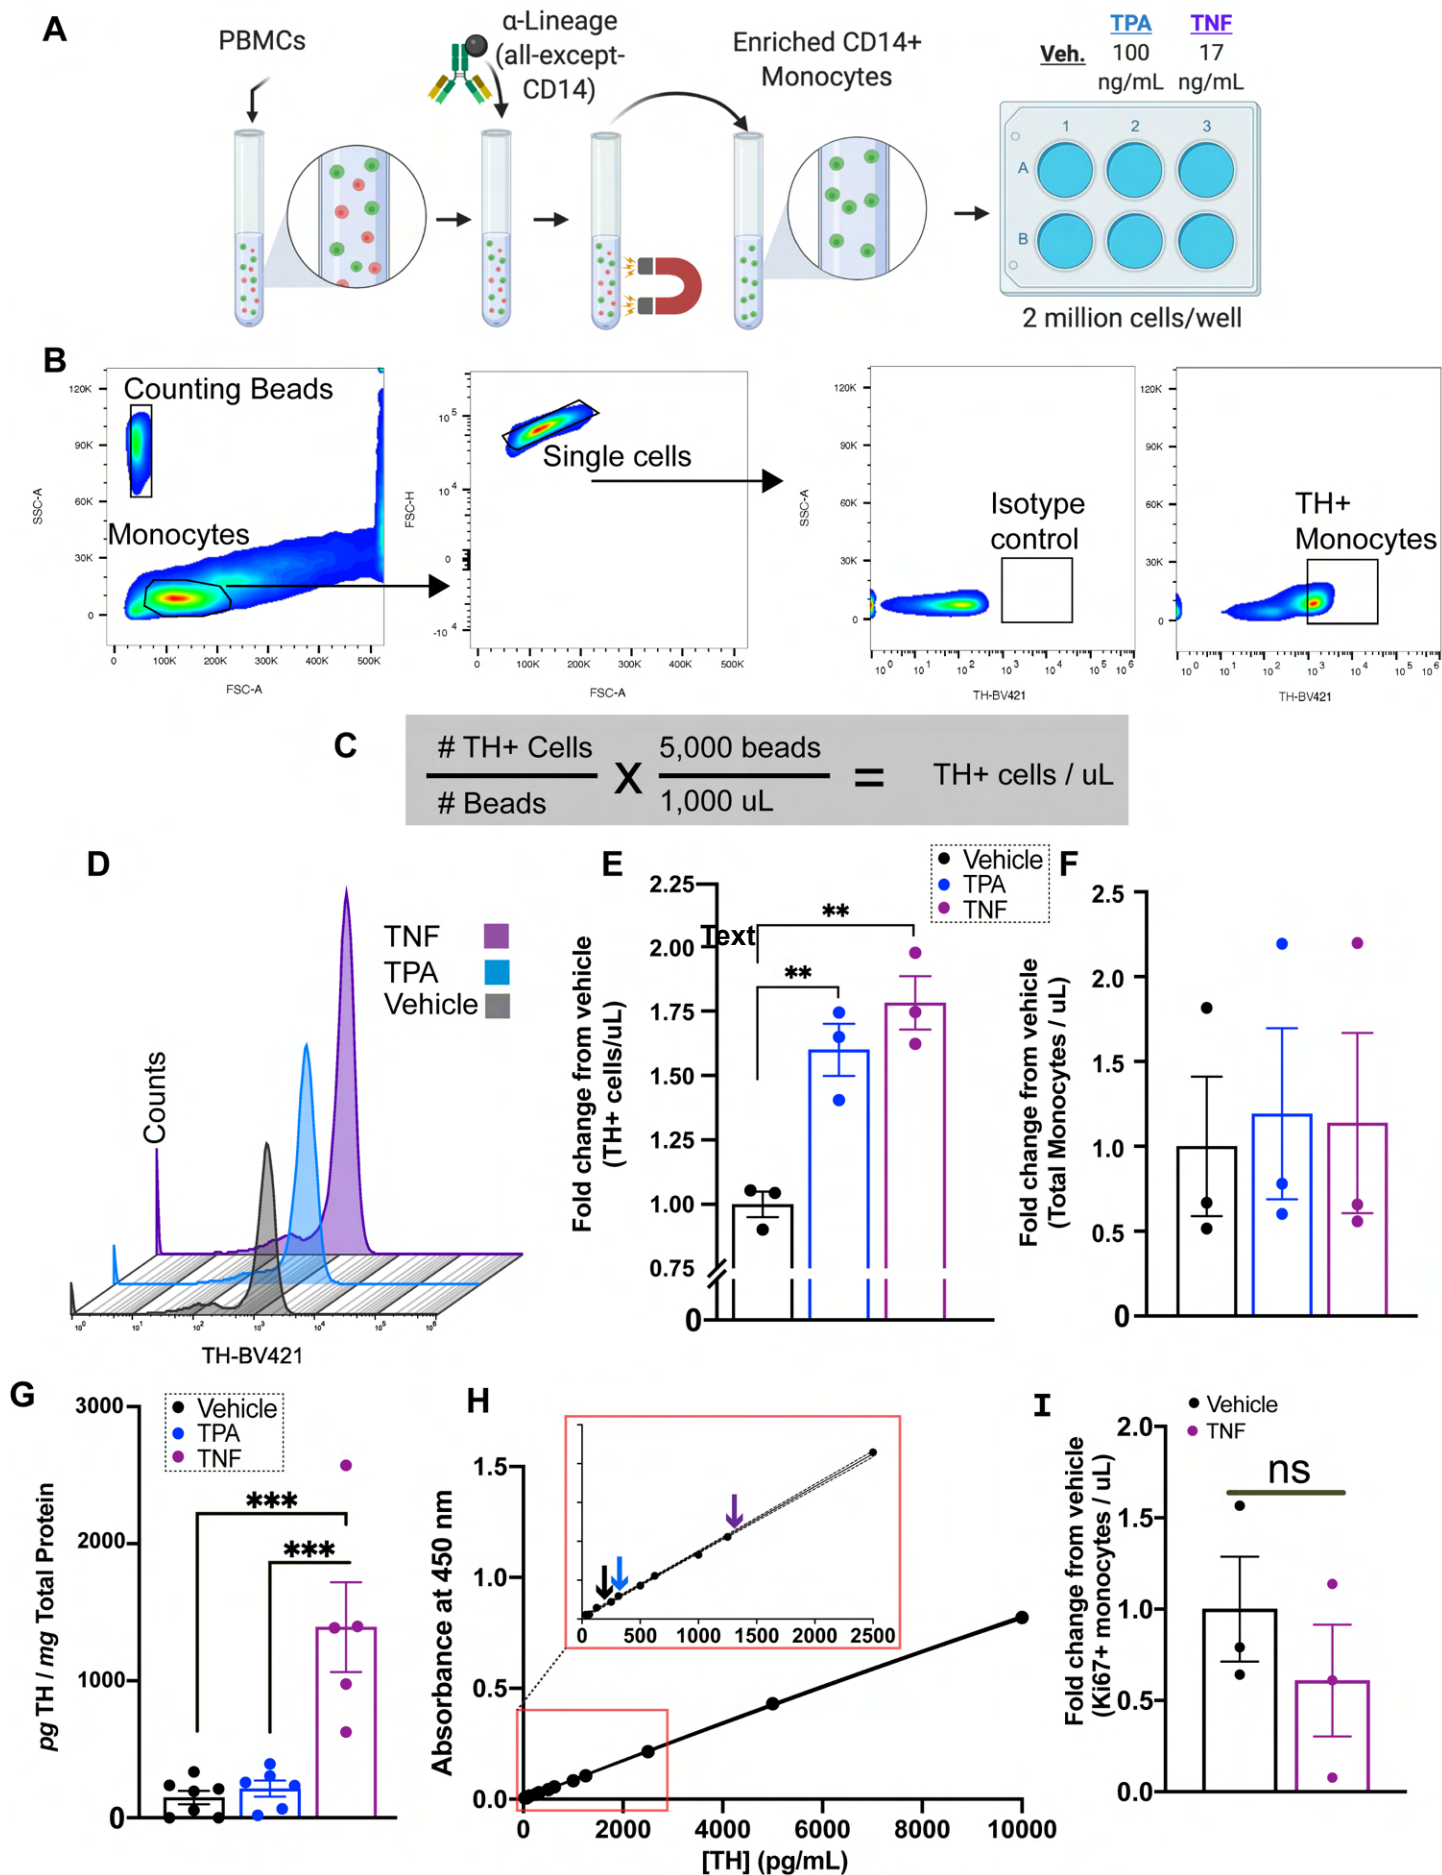

Figure 6

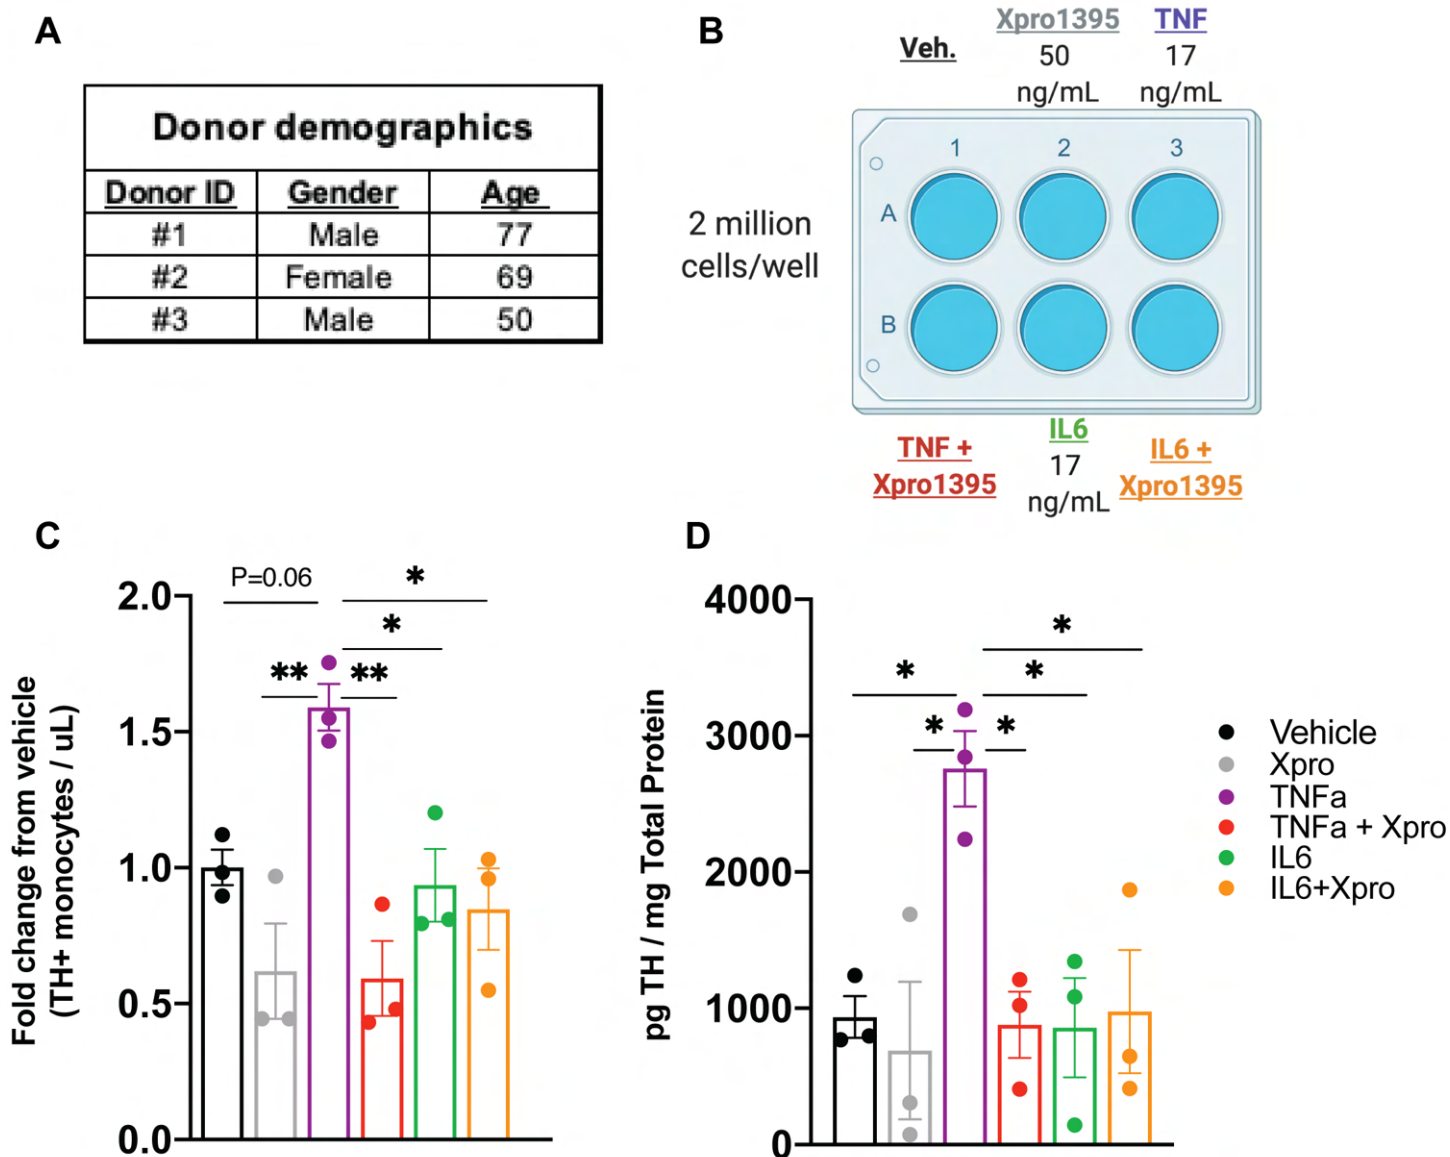

**Table 1: Antibodies**

| Specificity | Clone/Species      | Conjugate | Vendor      | Catalog Number | Purpose            | Dilution       | Concentration |
|-------------|--------------------|-----------|-------------|----------------|--------------------|----------------|---------------|
| TH          | Polyclonal/Rabbit  | N/A       | Sigma       | AB152          | WB                 | 1:1,000        | 0.1 ug/mL     |
| TH          | Monoclonal/Mouse   | N/A       | EnCor       | MCA-4H2        | WB, ELISA, IHC     | 1:1,000, 1:100 | 1 ug/mL       |
| TH          | Polyclonal/Rabbit  | N/A       | EnCor       | RPCA-TH        | WB, IHC            | 1:1,000, 1:500 | 1 ug/mL       |
| TH          | Polyclonal/Rabbit  | Biotin    | EnCor       | RPCA-TH        | ELISA              | 1:6,000        | 1.65 ug/mL    |
| Chicken     | Polyclonal/Rabbit  | HRP       | Sigma       | A9046          | WB                 | 1:1,000        | 1 ug/mL       |
| Mouse       | Polyclonal/Goat    | IR-800    | Licor       | 92632210       | WB                 | 1:15,000       | 0.0003 ug/mL  |
| Rabbit      | Polyclonal/Goat    | IR-680    | Licor       | 92568071       | WB                 | 1:15,000       | 0.0003 ug/mL  |
| CD14        | Nanobeads          | Magnetic  | Biolegend   | 480093         | Magnetic Isolation | 20uL/20M cells | N/A           |
| Biotin      | N/A (Avidin)       | HRP       | Vector Labs | A2004          | ELISA              | 1:2,500        | 0.0004 ug/mL  |
| Mouse       | Polyclonal/Goat    | HRP       | Biolegend   | 405306         | IHC                | 1:250          | 0.002ug/mL    |
| Rabbit      | Polyclonal/Donkey  | HRP       | Biolegend   | 406401         | IHC                | 1:250          | 0.002ug/mL    |
| CD14        | Polyclonal         | Magnetic  | Biolegend   | 480048         | ELISA, FC          | Mfg Instr.     | N/A           |
| Ki67        | Polyclonal/Chicken | N/A       | Encor       | CPCA-Ki67      | FC                 | 1:100          | 0.1ug/mL      |
| Chicken     | Polyclonal/Goat    | Alexa 488 | LifeTech    | A-11039        | FC                 | 1:100          | 0.2ug/mL      |

**Table 2: Reagents and Materials**

| Reagent                           | Supplier             | Catalog Number | Purpose                                          | Concentration        |
|-----------------------------------|----------------------|----------------|--------------------------------------------------|----------------------|
| EZ-Link Sulfo-NHS-LC-Biotin       | Thermo Scientific    | A39257         | RPCA-TH biotinylation                            | 20-fold molar excess |
| Fat-free milk                     | Carnation            | N/A            | WB/ELISA                                         | 1% or 5%             |
| Clarity Western                   | BioRad               | 1705061        | WB ECL                                           | N/A                  |
| TMB Substrate                     | ThermoFisher         | 34028          | ELISA                                            | Stock                |
| NiDAB                             | Vector Labs          | SK-4100        | IHC                                              | Stock                |
| TPA                               | Biolegend            | 755802         | ELISA, FC                                        | 100ng/mL             |
| IL6                               | Biolegend            | 570802         | ELISA, FC                                        | 17ng/mL              |
| TNF-alpha                         | Biolegend            | 570102         | ELISA, FC                                        | 17ng/mL              |
| H2SO4                             | Sigma                | 339741         | ELISA                                            | 2N                   |
| TritonX-100                       | ThermoFisher         | BP151-100      | Magnetic Isolation                               | 1%                   |
| Tween-20                          | ThermoFisher         | MP1Tween201    | TBS-T                                            | 0.2%                 |
| Protease Inhibitor                | Millipore            | 539191         | Cell lysis                                       | 1x                   |
| DC Protein assay                  | Biorad               | 5000112        | Protein assay                                    | N/A                  |
| FBS                               | Gemini               | 100-106        | Cell Culture                                     | 10% or 5%            |
| Horse Serum                       | Sigma                | H1138-500ML    | Cell Culture                                     | 5%                   |
| Pen/Strep                         | ThermoFisher         | 15-140-122     | Cell Culture                                     | 1%                   |
| RPMI                              | Corning              | 10-017         | Cell Culture                                     | Stock                |
| Immulon 4HBX                      | ThermoFisher         | 3855           | ELISA                                            | N/A                  |
| MojoSort Buffer 5x                | Biolegend            | 480017         | Magnetic cell isolation                          | 1x                   |
| Leucosep Tubes                    | Grenier BioOne       | 227290P        | PBMC isolation                                   | N/A                  |
| Ultra-low-adherence 6-well plates | Corning              | 3471           | TPA/TNF-alpha stimulation in vitro, for ELISA/FC | N/A                  |
| Accumax                           | Innovative Cell Tech | AM105          | Cell detachment                                  | Stock                |
| CountBright beads XPro1595        | Invitrogen           | C36950         | FC                                               | 5000 beads/uL        |

| Equipment          | Supplier  | Part Number | Purpose                    |
|--------------------|-----------|-------------|----------------------------|
| Centrifuge         | Eppendorf | 5424R       | Cell lysate centrifugation |
| Centrifuge         | Sorvall   | ST8         | Cell culture               |
| Magnet             | Biolegend | 480019      | Magnetic Isolation         |
| Plate reader       | Biorad    | iMark       | WB/ELISA                   |
| Odyssey            | Licor     | Odyssey     | WB                         |
| ChemiDoc+          | Biorad    | ChemiDoc MP | WB                         |
| Mini-Protean Tetra | Biorad    | 1658005     | WB                         |
| ELISA shaker       | VWR       |             | ELISA incubations          |
| Plate Washer       | BioTek    | ELX-405     | ELISA washes               |
| Spectral Analyzer  | Sony      | SP6800      | FC                         |

| <b>Dissociation Media</b>        |                   |                          |                |
|----------------------------------|-------------------|--------------------------|----------------|
| Chemical name                    | Concentration     | Vendor                   | Catalog Number |
| NaCl                             | 116 mM            | Sigma- Aldrich           | S7653          |
| NaHCO <sub>3</sub>               | 26 mM             | Sigma- Aldrich           | D6546          |
| NaH <sub>2</sub> PO <sub>4</sub> | 2 mM              | Sigma- Aldrich           | S9638          |
| D-glucose                        | 25 mM             | Sigma- Aldrich           | G8769          |
| MgSO <sub>4</sub>                | 1 mM              | Sigma- Aldrich           | M7506          |
| Cysteine                         | 1.3 mM            | Sigma- Aldrich           | C7352          |
| Papain                           | 400 units/ml      | Worthington              | LS003127       |
| Kynurenic acid                   | 0.5 mM            | Sigma- Aldrich           | K3375          |
| <b>Glia Media</b>                |                   |                          |                |
| Chemical name                    | Concentration (%) | Vendor                   | Catalog Number |
| DMEM                             | 51.45             | Thermo Fisher Scientific | 11330032       |
| Fetal Bovine Serum               | 39.60             | Gemini                   | 100-106        |
| Penicillin/Streptomycin          | 0.97              | Thermo Fisher Scientific | 15-140-122     |
| Glutamax 100X                    | 0.97              | Thermo Fisher Scientific | 35050061       |
| Insulin (25mg/ml stock)          | 0.08              | Sigma-Aldrich            | I5500          |
| <b>Neuronal Media</b>            |                   |                          |                |
| Chemical name                    | Concentration (%) | Vendor                   | Catalog Number |
| Neurobasal-A                     | 96.9              | Thermo Fisher Scientific | 10888022       |
| B27 Plus                         | 1.9               | Thermo Fisher Scientific | A3582801       |
| GDNF                             | 0.97              | Sigma-Aldrich            | SRP3200        |
| Glutamax 100X                    | 0.15              | Thermo Fisher Scientific | 35050061       |
| Kynurenic acid                   | 0.08              | Sigma-Aldrich            | K3375          |
